# Supplementary material for: Codesigning a systemic discharge intervention for inpatient mental health settings (MINDS): a protocol for integrating realist evaluation and an engineering-based systems approach
Source: PubMed Central journal article supplement (PMC10503342; doi:10.1136/bmjopen-2022-071272), 2023-09-13
Supplement: bmjopen-2022-071272.draft_revisions.pdf [file bmjopen-2022-071272.draft_revisions.pdf]

# BMJ Open

BMJ Open is committed to open peer review. As part of this commitment we make the peer review history of every article we publish publicly available.

When an article is published we post the peer reviewers' comments and the authors' responses online. We also post the versions of the paper that were used during peer review. These are the versions that the peer review comments apply to.

The versions of the paper that follow are the versions that were submitted during the peer review process. They are not the versions of record or the final published versions. They should not be cited or distributed as the published version of this manuscript.

BMJ Open is an open access journal and the full, final, typeset and author-corrected version of record of the manuscript is available on our site with no access controls, subscription charges or pay-per-view fees (<http://bmjopen.bmj.com>).

If you have any questions on BMJ Open's open peer review process please email [info.bmjopen@bmj.com](mailto:info.bmjopen@bmj.com)

# BMJ Open

## Coproducing improved Mental health Inpatient Discharge using a Systems approach (MINDS): Study Protocol

|                               |                                                                                                                                                                                                                                                                                                                                                                                                                                                                                                                                                                                                                                                                                                                                                                                                                                                                                                                                                                                                                                                                                                                                                                                                                                                                                                                                                                                                                                                                                                                                                                                                                                                                                                                                                                                                                                                                                                                                                                |
|-------------------------------|----------------------------------------------------------------------------------------------------------------------------------------------------------------------------------------------------------------------------------------------------------------------------------------------------------------------------------------------------------------------------------------------------------------------------------------------------------------------------------------------------------------------------------------------------------------------------------------------------------------------------------------------------------------------------------------------------------------------------------------------------------------------------------------------------------------------------------------------------------------------------------------------------------------------------------------------------------------------------------------------------------------------------------------------------------------------------------------------------------------------------------------------------------------------------------------------------------------------------------------------------------------------------------------------------------------------------------------------------------------------------------------------------------------------------------------------------------------------------------------------------------------------------------------------------------------------------------------------------------------------------------------------------------------------------------------------------------------------------------------------------------------------------------------------------------------------------------------------------------------------------------------------------------------------------------------------------------------|
| Journal:                      | <i>BMJ Open</i>                                                                                                                                                                                                                                                                                                                                                                                                                                                                                                                                                                                                                                                                                                                                                                                                                                                                                                                                                                                                                                                                                                                                                                                                                                                                                                                                                                                                                                                                                                                                                                                                                                                                                                                                                                                                                                                                                                                                                |
| Manuscript ID                 | bmjopen-2022-071272                                                                                                                                                                                                                                                                                                                                                                                                                                                                                                                                                                                                                                                                                                                                                                                                                                                                                                                                                                                                                                                                                                                                                                                                                                                                                                                                                                                                                                                                                                                                                                                                                                                                                                                                                                                                                                                                                                                                            |
| Article Type:                 | Protocol                                                                                                                                                                                                                                                                                                                                                                                                                                                                                                                                                                                                                                                                                                                                                                                                                                                                                                                                                                                                                                                                                                                                                                                                                                                                                                                                                                                                                                                                                                                                                                                                                                                                                                                                                                                                                                                                                                                                                       |
| Date Submitted by the Author: | 21-Dec-2022                                                                                                                                                                                                                                                                                                                                                                                                                                                                                                                                                                                                                                                                                                                                                                                                                                                                                                                                                                                                                                                                                                                                                                                                                                                                                                                                                                                                                                                                                                                                                                                                                                                                                                                                                                                                                                                                                                                                                    |
| Complete List of Authors:     | <p>Hackmann, Corinna; Norfolk and Suffolk NHS Foundation Trust, Research and Development<br/>         Komashie, Alexander; University of Cambridge School of Technology, Department of Engineering<br/>         Handley, Melanie; University of Hertfordshire, CRIPACC<br/>         Murdoch, Jamie; King's College London, School of Life Course and Population Sciences,<br/>         Wagner, Adam; NIHR Collaboration for Leadership in Applied Health Research &amp; Care (CLAHRC) East of England, ; University of East Anglia, Norwich Medical School<br/>         Grünwald, Lisa Marie; Norfolk and Suffolk Foundation Trust<br/>         Waller, Sam; University of Cambridge, Engineering Design Centre<br/>         Kaminskiy, Emma; Anglia Ruskin University, School of Psychology and Sports Science<br/>         Zeilig, Hannah; University of the Arts London, London College of Fashion<br/>         Jones, Julia; University of Hertfordshire, Centre for Research in Primary &amp; Community Care<br/>         Bray, Joy; Independant<br/>         Bagge, Sophie; Norfolk and Suffolk NHS Foundation Trust<br/>         Simpson, Alan; King's College London, Health Services and Population Research; King's College London<br/>         Dalkin, Sonia; Northumbria University, Faculty of Health and Life Sciences<br/>         Clarkson, John; University of Cambridge, Engineering Design Centre<br/>         Borghini, Giovanni; Hertfordshire and Peterborough NHS Foundation Trust<br/>         Kipouros, Timoleon; University of Cambridge, Department of Engineering<br/>         Rohricht, Frank ; East London NHS Foundation Trust<br/>         Taousi, Zohra; Hertfordshire and Peterborough NHS Foundation Trust<br/>         Haighton, Catherine ; Northumbria University,<br/>         Rae, Sarah; Cambridgeshire and Peterborough NHS Foundation Trust<br/>         Wilson, Jon; Norfolk and Suffolk NHS Foundation Trust,</p> |
| Keywords:                     | MENTAL HEALTH, QUALITATIVE RESEARCH, Adult psychiatry < PSYCHIATRY                                                                                                                                                                                                                                                                                                                                                                                                                                                                                                                                                                                                                                                                                                                                                                                                                                                                                                                                                                                                                                                                                                                                                                                                                                                                                                                                                                                                                                                                                                                                                                                                                                                                                                                                                                                                                                                                                             |
|                               |                                                                                                                                                                                                                                                                                                                                                                                                                                                                                                                                                                                                                                                                                                                                                                                                                                                                                                                                                                                                                                                                                                                                                                                                                                                                                                                                                                                                                                                                                                                                                                                                                                                                                                                                                                                                                                                                                                                                                                |

1  
2  
3  
4  
5  
6  
7  
8  
9  
10  
11  
12  
13  
14  
15  
16  
17  
18  
19  
20  
21  
22  
23  
24  
25  
26  
27  
28  
29  
30  
31  
32  
33  
34  
35  
36  
37  
38  
39  
40  
41  
42  
43  
44  
45  
46  
47  
48  
49  
50  
51  
52  
53  
54  
55  
56  
57  
58  
59  
60

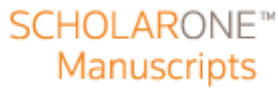

**Title**

Coproducing improved **M**ental health **I**npatient **D**ischarge using a **S**ystems approach (MINDS): Study Protocol

**Full name, postal address and e-mail of the corresponding author**

Corinna Hackmann  
Research and Development Dept  
Norfolk and Suffolk Foundation Trust  
Hellesdon Hospital  
Drayton High Road  
NR6 5BE

Email: [Corinna.hackmann@nsft.nhs.uk](mailto:Corinna.hackmann@nsft.nhs.uk)

Telephone number: 07946 355725

**Email address for each author**

Alexander Komashie: [ak670@cam.ac.uk](mailto:ak670@cam.ac.uk)  
Melanie Handley: [m.j.handley@herts.ac.uk](mailto:m.j.handley@herts.ac.uk)  
Jamie Murdoch: [jamie.murdoch@kcl.ac.uk](mailto:jamie.murdoch@kcl.ac.uk)  
Adam P Wagner: [Adam.Wagner@uea.ac.uk](mailto:Adam.Wagner@uea.ac.uk)  
Lisa Grunwald: [Lisa.Grunwald@nsft.nhs.uk](mailto:Lisa.Grunwald@nsft.nhs.uk)  
Sam Waller: [sdw32@cam.ac.uk](mailto:sdw32@cam.ac.uk)  
Emma Kaminskiy: [emma.kaminskiy@aru.ac.uk](mailto:emma.kaminskiy@aru.ac.uk)  
Hannah Zeilig: [h.zeilig@fashion.arts.ac.uk](mailto:h.zeilig@fashion.arts.ac.uk)  
Julia Jones: [j.jones26@herts.ac.uk](mailto:j.jones26@herts.ac.uk)  
Joy Bray: [joy.bray@talktalk.net](mailto:joy.bray@talktalk.net)  
Sophie Bagge: [Sophie.Bagge@nsft.nhs.uk](mailto:Sophie.Bagge@nsft.nhs.uk)  
Alan Simpson: [alan.simpson@kcl.ac.uk](mailto:alan.simpson@kcl.ac.uk)  
Sonia Dalkin: [s.dalkin@northumbria.ac.uk](mailto:s.dalkin@northumbria.ac.uk)  
John Clarkson: [pjc10@cam.ac.uk](mailto:pjc10@cam.ac.uk)  
Giovanni Borghini: [g.borghini@nhs.net](mailto:g.borghini@nhs.net)  
Timos Kipouros: [tk291@cam.ac.uk](mailto:tk291@cam.ac.uk)  
Frank Röhricht: [frank.rohricht@nhs.net](mailto:frank.rohricht@nhs.net)  
Zohra Taousi: [z.taousi@nhs.net](mailto:z.taousi@nhs.net)  
Catherine Haighton: [Katie.haighton@northumbria.ac.uk](mailto:Katie.haighton@northumbria.ac.uk)  
Sarah Rae: [sarah.rae@rockyroad.org.uk](mailto:sarah.rae@rockyroad.org.uk)  
Jon Wilson: [Jon.Wilson@nsft.nhs.uk](mailto:Jon.Wilson@nsft.nhs.uk)

**Full name, department, institution, city and country of all co-authors**

Corinna Hackmann,<sup>1,2</sup> Alexander Komashie,<sup>3,4</sup> Melanie Handley,<sup>5</sup> Jamie Murdoch,<sup>6</sup> Adam P Wagner,<sup>2,7</sup> Lisa Grunwald,<sup>1</sup> Sam Waller,<sup>3</sup> Emma Kaminskiy,<sup>8</sup> Hannah Zeilig,<sup>9</sup> Julia Jones,<sup>5</sup> Joy Bray, Sophie Bagge,<sup>1</sup> Alan Simpson,<sup>10</sup> Sonia Dalkin,<sup>11</sup> John Clarkson,<sup>3</sup> Giovanni Borghini,<sup>12</sup> Timos Kipouros,<sup>3</sup> Frank Röhricht,<sup>13,14</sup> Zohra Taousi,<sup>12</sup> Catherine Haighton,<sup>11</sup> Sarah Rae\*, Jon Wilson\*<sup>1,2</sup>

\* Sarah Rae and Jon Wilson are joint senior authors

1. Norfolk and Suffolk NHS Foundation Trust, Norwich, UK
2. Norwich Medical School, University of East Anglia, Norwich, UK
3. Engineering Design Centre, Department of Engineering, University of Cambridge, Cambridge, UK
4. The Healthcare Improvement Studies (THIS) Institute, University of Cambridge, Cambridge, UK
5. Centre for Research in Public Health & Community Care (CRIPACC), University of Hertfordshire, Hatfield, UK
6. School of Life Course and Population Sciences, King's College London, London, UK
7. National Institute for Health Research (NIHR) Applied Research Collaboration (ARC) East of England (EoE), Cambridge, UK
8. School of Psychology and Sports Science, Anglia Ruskin University, Cambridge, UK
9. London College of Fashion, University of the Arts, London, UK
10. Florence Nightingale Faculty of Nursing, Midwifery and Palliative Care, King's College London, London, UK
11. Faculty of Health and Life Sciences, Northumbria University Faculty of Health and Life Sciences, Newcastle upon Tyne, UK
12. Hertfordshire Partnership University NHS Foundation Trust
13. East London NHS Foundation Trust, London, UK
14. Wolfson Institute of Population Health, Queen Mary University of London, London, UK

Joy Bray and Sarah Rae are independent

### **Word count, excluding title page, abstract, references, figures and table**

Word Count: 3978 words.

### **Keywords**

- Mental health
- Hospital discharge
- Co-production
- Systems approach
- Realist research
- Socio-technical system

## ABSTRACT

### Introduction

Transition following discharge from mental health hospital is high risk in terms of relapse, readmission, and suicide. Discharge planning supports transition and reduces risk. It is a complex activity involving interacting systemic elements. The MINDS study aims to improve the process for people being discharged, their carers/supporters and staff who work in mental health services, by understanding, co-designing and evaluating implementation of a systemic approach to discharge planning.

### Methods and analysis

The MINDS study integrates realist research and an engineering-informed systems approach across three Work Packages (WP). WP1 integrates realist methods with a systems approach to develop programme theories of discharge planning. WP2 uses an engineering systems approach to co-design a novel Systemic Discharge Care Approach, which will be subject to process and economic evaluation in WP3. The programme theories and resulting care planning approach will be refined throughout the study ready for a future clinical trial. MINDS is co-led by an expert by experience, with researchers with lived experience co-leading each WP.

### Ethics and dissemination

MINDS WP1 has received ethical approval (REC ref: 22/YH/0122). Findings from MINDS will be disseminated via high impact journal publications and conference presentations, including those with service user and mental health professional audiences. We will establish routes to engage with public and service user communities and NHS professionals including blogs, podcasts and short videos.

### Registration

MINDS is funded by the National Institute of Health Research (NIHR 133013) <https://fundingawards.nihr.ac.uk/award/NIHR133013> The realist review protocol is registered on PROSPERO (CRD42021293255).

## STRENGTHS AND LIMITATIONS OF THIS STUDY

- MINDS was conceived from lived experience and is aiming for high standards of co-production
- MINDS incorporates realist methods with a systems-based engineering approach to understand and improve discharge experience and outcomes
- The complexity and pace of delivery and funding constraints might be barriers to co-production, but the team have extensive experience, is evaluating levels of co-production and will report these
- Some aspects of the MINDS project, including the translation of lived experience into outputs, are flexible and responsive to emerging discoveries; consequently, there may be refinements to the protocol – these will be outlined in related MINDS publications

## INTRODUCTION

The transition period following discharge is high risk; around 13% of people are quickly readmitted<sup>1</sup> and rates of suicide have been found to be 191 times higher for working age adults compared to matched-age comparators.<sup>2</sup> A wide range of factors contribute to relapse following discharge,

1  
2  
3 including feeling overwhelmed, managing mental health symptoms, returning to roles and day-to-day  
4 pressures of life.<sup>3,4,5</sup> Discharge planning supports transition and reduces risk by identifying post-  
5 discharge needs and how to manage these.<sup>3,6</sup> National Institute of Health and Care Excellence (NICE)  
6 guidance and the Care Quality Commission identify that discharge planning should be collaborative  
7 and person centred<sup>7,8</sup> but provide limited clarity on how this should be achieved.  
8  
9

10 Evidence suggests that discharge is often inadequately planned with little involvement from the  
11 person being discharged and their carers/supporters, resulting in poor transition and increased risk.<sup>9-  
12 12</sup>The charity Mind surveyed 1,221 people who had experienced discharge finding that 33% were given  
13 either no or insufficient notice of discharge, and for 37% there was no plan post discharge.<sup>13</sup>  
14

15 Discharge planning is complex and involves many multi-faceted interacting systemic elements. People  
16 are heterogenous in terms of needs. Mental health service delivery is reliant on the reasoning,  
17 reactions and actions of staff, which are influenced by the wider system. Discharge planning therefore  
18 needs to address the needs of the person being discharged while working within organisational  
19 complexity, constraints and priorities.  
20

21  
22 Previous interventions neglect complex systemic factors that either support or undermine discharge  
23 planning.<sup>14</sup> Neglecting the wider system, including systemic pressures and the needs of staff, is likely  
24 to explain why previous attempts to improve discharge have failed. To establish effective discharge  
25 planning procedures, it is critical to understand the ward as a complex system (operating within wider  
26 systems and national policy). Acknowledging such complexity reframes health services research “from  
27 investigations of complex social interventions to interventions in complex social systems”,<sup>15</sup> echoing  
28 perspectives articulated across public health and global health systems research.<sup>16,17</sup> Despite growing  
29 recognition of the need for systems approaches in healthcare,<sup>18-21</sup> to date no research has used this to  
30 improve mental health discharge.  
31  
32

## 33 **METHODS AND ANALYSIS**

### 34 **Study design**

35  
36 Realist reviews<sup>22</sup> and evaluations<sup>23</sup> explain how and why change occurs through causal mechanisms.<sup>24</sup>  
37 We will use a healthcare-based systems approach as a framework for building and refining programme  
38 theories of discharge planning that set out relationships of components across system-levels in a  
39 socio-technical context (that is, people interacting with each other and technical components such as  
40 electronic records). This will comprise multiple context-mechanism-outcome configurations (CMOCs)  
41 to explain what works, for whom and in what circumstances. The programme theories will inform  
42 system design solutions for discharge.  
43  
44

45  
46 Engineering Better Care (EBC) is an established engineering systems approach for the design of safe  
47 and successful healthcare delivery.<sup>25-27</sup> The EBC framework involves four key perspectives:<sup>28</sup> 1) ‘People’  
48 focusses on the needs of key stakeholders; 2) ‘Systems’ explores the interactions between  
49 stakeholders and layers of the system; 3) ‘Design’ encourages innovation and investigates issues  
50 before proposing solutions; 4) ‘Risk’ predicts and models the risks associated with all proposed  
51 solutions. EBC will inform the co-design of a systemic approach to discharge. Implementation and  
52 economic implications will be evaluated to refine the discharge process.  
53  
54

### 55 **Project aim**

56 Co-produce and evaluate implementation and cost impact of a systemic approach to discharge.  
57  
58

### 59 **Project objectives**

60

1. **Understand** discharge planning as a complex intervention
2. **Co-design** a Systemic Discharge Care Approach (SDCA)
3. **Evaluate** acceptability, implementation and cost-impact of the SDCA

### Research questions

1. How and in what contexts is mental health discharge currently performed?
2. Who are the primary stakeholders (e.g., service users,<sup>a</sup> carers/supporters, NHS staff), how can they be characterised, and what are their needs?
3. What are the successful outcomes for mental health discharge, how do these relate to contexts across the system, and what are the mechanisms underlying this?
4. How can mental health discharge be improved?
5. How can this be implemented and measured?

### Patient and Public Involvement

The MINDS study is co-led by SR, who conceived the idea from lived experience of unhelpful discharge. Each WP is co-led by researchers with relevant lived experience. MINDS includes a Lived Experience Advisory Group (LEAG) comprised of people with relevant lived experience or experience of being a significant carer or supporter. The LEAG will offer governance and support co-production and key strategic decision-making throughout the project. The study Steering Committee (SSC) includes two members with lived experience, one of whom is co-chair. The methodological approaches adopted align with current empirical healthcare research theory including MRC complex intervention guidance.<sup>29</sup> Systems and realist approaches were selected as they also intrinsically value and prioritise key stakeholder perspectives and an iterative approach to knowledge generation.

### Study sites

Sites were purposively sampled to represent geographically distinct (serving rural and urban communities) statutory mental healthcare organisations with different demographic profiles and mixed public inspection (CQC) ratings. Three mental healthcare sites are included. Two wards will be selected from each site for ward observations and evaluation of the SDCA. MINDS recognises that minority ethnic service users are disproportionately detained under the UK Mental Health Act<sup>30-32</sup> and overrepresented among psychiatric in-patients in UK statutory provision.<sup>33</sup> Consequently, we will monitor recruitment and employ targeted strategies to ensure the study sample reflects diversity of experience.

### Recruitment

Figure 1 details recruitment aims across the MINDS project. There will be diverse promotion of the study to ensure broad access to participation, including (but not limited to) posters in clinical areas, participation newsletters, attendance at participation events. Additionally, eligible individuals may be

---

<sup>a</sup> The MINDS research team's preferred term for people who have lived experience of accessing mental services is 'people'. However, we have used the term 'service user' where discussing participants in the research project to delineate between different groups



1  
2  
3 contacted by their clinical team, or where they have signed-up to be contacted for research, by the  
4 research team to enquire if they are interested in participation.  
5  
6  
7

8 Figure 1 [here]  
9

10 Recruitment aims across the three WPs  
11  
12  
13

#### 14 **Inclusion criteria**

15 Service users  
16

17 Interviews, focus groups and workshops: all service users (18 years and over), accessing community  
18 mental health services in the research sites, discharged within the previous 12 months (WP1), or being  
19 discharged from a research site ward (WP3), will be eligible.  
20

21 Ward-based observations: all service users (18 years and over) currently admitted on selected wards.  
22  
23  
24

25 Staff  
26

27 Staff, working in participating mental healthcare organisations, whose role impacts (directly or  
28 indirectly) on inpatient discharge.  
29  
30  
31

32 Carers/supporters  
33

34 Carers/supporters (people who identify as having a significant caring or supportive role) for people  
35 who have experienced inpatient discharge in one of the participating mental healthcare organisations  
36 within the last 12 months.  
37  
38  
39

#### 40 **RESEARCH PLAN**

41 The MINDs study operates across three WPs.  
42  
43  
44  
45

#### 46 **WP1: Understand discharge planning as a complex intervention**

47 WP1 Aim  
48

49 Build, test and refine evidence-based programme theories of discharge planning and preparation as a  
50 complex intervention  
51  
52  
53

54 WP1 Objectives  
55

- 56 1) Conduct a realist review integrating the EBC systems approach to map and explain the
- 57 relationship between key factors involved in discharge planning
- 58 2) Identify service user needs for discharge planning
- 59 3) Test programme theories in a realist evaluation across three case study sites  
60

#### 4) Refine programme theories to inform co-design work in WP2

##### WP1 Design

##### *Realist Review*

A realist review will synthesise quantitative and qualitative evidence on service user, carer and staff experiences of, and interventions for, discharge planning. The review will result in evidence-based theories that include factors across all system levels to explain post-discharge outcomes. The review will consist of three iterative stages:

1) Defining review scope, concept mining and initial theory development: a series of meetings with the research team and LEAG will be used to define the system of interest. Initial programme theories will be developed from literature identified from a systematic review<sup>14</sup> and an internal systematic search with supplementary searches for existing programme theories of mental health discharge planning.

2) Theory testing and refinement: the core review team will test and refine theories against evidence, conducting additional searches and discussions with the wider research team and LEAG. There are inherent biases in the literature and the lived experience perspective will help ensure that theories are relevant to those accessing services.

3) Analysis and synthesis: NVivo will be used to organise and track analysis. Tabulation and narrative write-up of evidence related to each programme theory will be shared with the research team and LEAG to support transparency and rigour in the analysis process. For more detail see realist review protocol on PROSPERO (CRD42021293255).

##### *Realist Evaluation*

We will conduct service user, carer and staff interviews, focus groups<sup>34</sup> and ward observations to refine the programme theories. An embedded case study design<sup>35</sup> will test programme theory components across systems within and between sites.

Interviews and focus groups will take the form of a 'teacher-learner' cycle,<sup>36</sup> inviting participants to confirm, refute or expand components of the programme theories based on their experience. Staff whose roles directly or indirectly impact discharge will be recruited across different levels of the system. Relevant sections of medical notes of service users recruited to interviews and focus groups will be reviewed. Anonymised data will be collected to provide aggregated service user characteristics and map the discharge process.

The observations will include communal areas, discharge conversations, relevant meetings, and ward rounds.<sup>37-39</sup> They aim to support understanding of interpersonal nuance, the way that contextual factors relate to outcomes and insights into causal mechanisms. Data will be collected using a template reflecting the programme theories. We will conduct a review of policy and strategy documents to provide an account of stated organisational aims and priorities for discharge and how documents are structured to support the process.

##### WP1 Analysis

The analysis will follow Realist and Meta-narrative Evidence Syntheses: Evolving Standards quality standards,<sup>40</sup> using realist logic.<sup>22,23</sup> A core team will work with LEAG members to iteratively evaluate

1  
2  
3 data in relation to the programme theories to facilitate theory refinement. NVivo<sup>41</sup> will support data  
4 management and analysis. Data coding will be deductive (informed by our initial programme theories),  
5 inductive (derived from the collected data) and reproductive (making inferences about mechanisms  
6 based on interpretations of our data to infer underlying causal processes). Evidence tables will be  
7 produced to demonstrate theory refinement.  
8  
9

#### 10 11 12 WP1 Outputs

- 13 • Evidence-based programme theories of discharge preparation and planning
- 14 • A rich understanding of context, including the stakeholders involved and their wants and  
15 needs from the discharge process
- 16 • A set of causal mechanisms operating within the discharge contexts  
17  
18  
19

#### 20 21 **WP2: Co-design a Systemic Discharge Care Approach**

##### 22 23 24 WP2 Aim

25  
26 Translate the programme theory into a sustainable Systemic Discharge Care Approach (SDCA) that  
27 meets service user needs, is compatible with how staff work, and feasible to implement.  
28  
29

##### 30 31 WP2 Objectives

32 Use a healthcare engineering systems approach as a framework to develop:

- 33 1) An agreed scope for the factors that can be changed within the discharge planning approach
- 34 2) An SDCA solution that has the potential to balance key wants and needs of all stakeholders
- 35 3) Methods for measuring the performance of the proposed solution against key wants and  
36 needs of service users and other stakeholders  
37  
38  
39

##### 40 41 WP2 Design

42 WP2 uses the EBC framework and Improving Improvement toolkit (IIToolkit, [www.iitoolkit.com](http://www.iitoolkit.com)).<sup>42</sup> This  
43 is a systems-based engineering approach that aligns with complex intervention development, as it is  
44 non-linear, creative, and forward looking to future evaluation.  
45  
46  
47

##### 48 49 Prioritisation Workshop

50 The wants and needs service users and other key stakeholders may conflict. In this case the research  
51 team and LEAG will review these, in combination with the agreed scope. The following structure  
52 (MoSCoW method)<sup>43</sup> will be used:  
53

- 54 • **Must** have: Core essential needs for an improved discharge process
- 55 • **Should** have: Highest priority 'wants'
- 56 • **Could** have: Secondary priority 'wants'
- 57 • **Won't** have: rejected as being incompatible with the agreed scope.  
58  
59  
60

1  
2  
3 The prioritised wants and needs embody what a 'better' solution would mean, across the perspectives  
4 of stakeholders, whilst acknowledging the pragmatic reality of delivery and resource limitations.  
5

#### 6 Exploratory Design Workshops

7  
8 Iterative 3-hour exploratory design workshops will be conducted at each study site with service users,  
9 staff and carers/supporters. The research team will use the Itoolkit to develop ideas and proposals  
10 for an improved discharge process. The tools and activities within the Itoolkit will be used to support  
11 an iterative process of problem-finding and -solving, in a systems context. This encourages divergent  
12 thinking to stimulate ideas about how the discharge process can be improved, and convergent thinking  
13 to consider how these ideas can be selected, refined, and developed to produce a small set of feasible  
14 concepts. This will challenge the understanding and insights gathered from WP1 and the scope of what  
15 can be delivered.  
16  
17

#### 18 Review and Refinement Workshop

19  
20 The exploratory design workshop outputs will be considered at two 3-hour sessions with the research  
21 team and LEAG. The research team and LEAG will review, refine and evaluate the ideas and concepts  
22 from the exploratory workshops, to give a recommended lead proposal for an improved discharge  
23 process (the SDCA). This may involve developing tools to better assist discharge planning, and/or  
24 reconfiguring the discharge process and/or updating the guidance for the discharge process. Team  
25 members involved in this work contribute skills in systems engineering, risk assessment and design,  
26 psychology, nursing, psychiatry and lived experience of discharge.  
27  
28  
29  
30  
31

#### 32 Feedback Sessions

33  
34 The SDCA will be further evaluated and refined during feedback sessions, with service users,  
35 carers/supporters and clinical staff. Assessment will be based on the prioritised wants and needs that  
36 informed the SDCA design, together with the success measures.  
37  
38  
39  
40

#### 41 Explanatory Model

42  
43 The research team and LEAG members will agree how the proposed solution could be practically  
44 measured against agreed wants and needs. The outputs from WP1 & 2 will be used by the research  
45 team and LEAG to develop a realist-informed explanatory model including resources, activities, and  
46 measurable process indicators for implementation. This will support data collection for WP3  
47  
48  
49

#### 50 WP2 Outputs

- 51  
52
- 53 • Prioritised wants and needs for an improved discharge process
  - 54 • Practical measures of success that are aligned with these prioritised wants and needs
  - 55 • The SDCA as an improved discharge process
  - 56 • Explanatory model to support implementation and evaluation
- 57

#### 58 **WP3: Evaluate acceptability, implementation, and cost-impact of the SDCA**

### WP3 Aims

- 1) Evaluate acceptability and implementation of the SDCA
- 2) Explore resource and cost implications, and determine feasibility of collecting data for a future economic evaluation
- 3) Inform a final specification for the SDCA that can be tested in a future Hybrid Type II trial that will determine effectiveness and impact, including economics, of the SDCA.

### WP3 Objectives

- 1) Understand acceptability, barriers, and facilitators to implementation of the SDCA
- 2) Evaluate how delivery and fidelity is shaped by the healthcare context
- 3) Measure reach, adoption, and maintenance
- 4) Risk-assess the use of the SDCA
- 5) Estimate resource and associated costs impact
- 6) Identify recommendations for optimisation, wider implementation, and future evaluation
- 7) Evaluate feasibility of collecting service user outcome and economic evaluation data

### WP3 Design

A parallel, mixed methods process evaluation will assess implementation and use of the SDCA. The explanatory model will specify steps for implementation, key stakeholders, process and quality indicators, and outcomes.

### Ward-based observations

Ward-based observations will be conducted to investigate implementation of the SDCA and how this interacts with the ward and wider contexts. This will include observing SDCA consultations and system strengthening components (e.g., training) as well as ward-based processes that impact on delivery.

### Semi-structured interviews with service users, carers/supporters and staff

Interviews will elicit service user perspectives on the acceptability of the SDCA, with a specific focus on how the resulting discharge planning supported discharge transition. Interviews with staff will be carried out six months after commencing use of the SDCA to allow it to be embedded into routine practice, obtaining perspectives on acceptability, barriers and facilitators to implementation, impact on quality of care over time, and recommendations for wide-scale implementation.

### Service user and outcome data

The feasibility of collecting service user demographics and outcome data from routine medical records and questionnaires will be assessed, including readmission, suicidality, mental health symptoms, personal recovery and quality of life. Participants will complete a questionnaire containing selected measures and resource use questions to inform data collection feasibility for future evaluation, resource use and associated cost analysis. Medical records will be reviewed to assess the reach, adoption, and maintenance of the SDCA.

## Data Analysis WP3a (Implementation of the SDCA)

### *Qualitative analysis*

Observational fieldnotes and document reviews will be analysed to describe the sequence and structure of different discharge planning processes as well as activities and critical points relating to discharge outcomes. Data from interviews and observations will iteratively ‘test out’ and extend analytical interpretations, enabling refinements to the programme theory. We will evaluate how the process and content of the SDCA ‘worked’ from the participants’ perspective, aiming to understand the quality of collaboration, usefulness of discharge planning outputs, and barriers and facilitators to implementation. A constant comparison approach will be adopted, working iteratively between data obtained from different interviewees within and between wards and sites. We will also analyse how different intervention components interact with relevant macro (e.g., national policy); meso (e.g., in-patient ward protocols, staff arrangements, other services); and micro (e.g., communication and behaviour within discharge planning encounters) contextual features relevant to scaled-up implementation. This will be undertaken with support of the LEAG.

### *Quantitative analysis*

Statistical analysis will include descriptive analyses of changes over time (e.g., numbers of discharge plans), and graphical plotting of changes, comparing trends between wards, both descriptively and potentially with regression. Additional analyses prompted by qualitative findings (e.g., effects of SDCA on specific groups or diagnoses) will be explored. Completion rates and patterns of data collection tools will be descriptively analysed to inform the data collection feasibility for future trialling.

### *Resource use and costing analysis*

Recorded resource use will be multiplied by standard unit costs.<sup>44</sup> A key costing perspective will be that of the NHS and Social Services, but we will also disaggregate costs to consider those incurred by 1) the inpatient wards; 2) other providers; and 3) service users (e.g., out of pocket costs). This will consider which costs are one-off (e.g., training) and recurring across levels of the system. Return rates and levels/patterns of missing data on the resource use questions will be descriptively analysed to inform the feasibility of a future economic evaluation and refinements to the questionnaires to improve completion rates. Extraction of related data from routine sources will also be explored to further inform future evaluation.

### *Stakeholder focus groups*

Two stakeholder focus groups (6-8 participants per group, 12-16 in total) will be carried out towards the end of WP3 to identify how to optimise the SDCA intervention for wide-scale implementation and to determine priorities for a future trial. The key stakeholders will include a mixture of key stakeholders including mental health staff, service directors and policymakers who can provide critical insight on wider implementation. We will share findings from WP3 and ask stakeholders to make recommendations for finalising the design and content of the SDCA and required system strengthening components to optimise intervention implementation. We will map components

1  
2  
3 against the implementation strategies identified by the Expert Recommendations for Implementing  
4 Change<sup>45</sup> to finalise the SDCA.  
5  
6  
7

### 8 WP3 Outputs 9

- 10 • Finalised SDCA ready for implementation and trialling
- 11 • Refined programme theory
- 12 • Recommendations for implementation of the SDCA
- 13 • Estimation of the cost and resource impact of the SDCA
- 14 • Initial feasibility data for a Hybrid Type 2 trial of the SDCA including identified service user  
15 outcomes, process/implementation indicators and economic measures  
16  
17  
18  
19

### 20 **CONSENT** 21

22 We are consenting five groups of service users, carers/supporters, and staff (see Figure 1):  
23

- 24 1. Service users who are currently admitted for the ward-based observations (WP1)
- 25 2. Service users in the community who have had experience of discharge from a mental health  
26 ward within the last 12 months for interviews and focus groups (WP1 & 2)
- 27 3. Service users who are being discharged (WP3)
- 28 4. Carers/supporters of people who have been discharged in the last 12 months (WP1, 2 & 3)
- 29 5. Staff who have roles that impact on inpatient discharge (WP1, 2 & 3)  
30  
31  
32

33 For interviews, focus groups and workshops, a research team member will arrange a consent meeting  
34 at least 48 hours after receipt of the Participant Information Sheet (PIS). It will be established that the  
35 participant has read this, understands the study and implications of participation and any questions  
36 are answered. Capacity to consent will be assessed.  
37

38 On the days of the ward observation, information posters will be displayed in areas where the  
39 observations are taking place. All staff and service users will be given verbal information and a  
40 simplified PIS about the reason for the observations and be asked to verbally consent to the  
41 observations. This simplified consent process has been designed to minimise burden and confusion  
42 for service users. Observers will be wearing a lanyard that makes it clear who they are and that they  
43 are undertaking observations. If approached, they will answer any questions transparently. Service  
44 users will be informed that they can choose to opt out of the observations at any time (they are also  
45 free to leave the observed space). Staff will be asked to opt out if they do not want to be observed.  
46 Staff will be informed that if they are concerned about observations including a particular service user,  
47 or if they become concerned about anybody during the observation, they can ask for the observation  
48 to be moved or terminated.  
49  
50  
51

52 All service-users who are discharged from the 3 study sites within the first 6 months of WP3 will be  
53 asked whether they wish to opt out of their routine data being used for research purposes.<sup>46-48</sup>  
54  
55

### 56 **ETHICS AND DISSEMINATION**

#### 57 **Ethical Considerations** 58 59 60

1  
2  
3 MINDS includes protocols for managing distress or safety issues relating to interviews, focus groups  
4 and ward observations, that have received ethical approval for WP1. These will also be applied to the  
5 activity for WPs 2 & 3. The SSC and LEAG will support ethical issues encountered during the study.  
6  
7  
8

### 9 **Dissemination**

10  
11 We have engaged with NICE, to consider different adoption/dissemination routes for the outputs from  
12 this programme of work (including future clinical trial findings). This is NIHR Applied Research  
13 Collaboration (ARC) East of England (EoE) affiliated project and findings will be disseminated via ARC  
14 platforms and networks. We will work with the LEAG, to develop journal publications and conference  
15 presentations. Key outputs will be shared with professional bodies, e.g., the Royal Colleges of  
16 Psychiatrists and Nursing. We will establish routes to engage with public and service user communities  
17 including blogs, podcasts and videos via partner Mind and reaching out to other organisations e.g.,  
18 National Survivor User Network (NSUN).  
19  
20  
21  
22

### 23 **Author Contributions**

24  
25 CH took the lead role in design, coordinating the design and writing the protocol. SR, JW, AK and LG  
26 had substantial roles in design and writing the protocol across all WPs. MH, JM, APW, SW, EK, HZ, JJ,  
27 SB had substantial roles in designing and writing aspects of specific WPs. All authors were involved in  
28 the conception and design of the project and editing and protocol across all WPs.  
29  
30  
31  
32

### 33 **Acknowledgements**

34 would like to thank LEAG members including Hajara Begum, Katie Fillingham, June Hanshaw, John  
35 Lucas, Isaac Samuels, and Roger Talbot for their ongoing input across the MINDS project; helping to  
36 ensure the processes and outputs reflect the experiences and needs of people with lived experience  
37 and their supporters.  
38  
39  
40  
41

### 42 **Funding statement**

43 This work is funded by the NIHR (NIHR133013). APW is supported by the NIHR ARC EoE. The views  
44 expressed are those of the authors and not necessarily those of the NIHR or the Department of Health  
45 and Social Care.  
46  
47  
48  
49

### 50 **Competing interests statement**

51 We declare no competing interests.  
52  
53  
54  
55  
56

## 57 **REFERENCES**

58  
59  
60



1. Vigod SN, Kurdyak PA, Dennis CL, Leszcz T, Taylor VH, Blumberger DM, Seitz DP. Transitional interventions to reduce early psychiatric readmissions in adults: systematic review. *BJ Psych*. 2013 Mar;202(3):187-94.
2. Musgrove, R., Carr, M. J., Kapur, N., Chew-graham, C. A., Mughal, F., Ashcroft, D. M., & Webb, R. T. (2022). Suicide and other causes of death among working- age and older adults in the year after discharge from in-patient mental healthcare in England: matched cohort study. *BJ Psych*. 468–475. <https://doi.org/10.1192/bjp.2021.176>
3. Mutschler C, Lichtenstein S, Kidd SA, Davidson L. Transition Experiences Following Psychiatric Hospitalization: A systematic Review of the Literature. *Community Ment. Health J*. 2019 Nov 1;55(8):1255-74.
4. Moreno C, Wykes T, Galderisi S, Nordentoft M, Crossley N, Jones N, Cannon M, Correll CU, Byrne L, Carr S, Chen EY. How mental health care should change as a consequence of the COVID-19 pandemic. *LANCET PSYCHIAT*. 2020 Jul 16.
5. Mind. The mental health emergency: how has the coronavirus pandemic impacted our mental health? United Kingdom: Mind. Available from: [https://www.mind.org.uk/media-a/5929/the-mental-health-emergency\\_a4\\_final.pdf](https://www.mind.org.uk/media-a/5929/the-mental-health-emergency_a4_final.pdf).
6. Nurjannah I, Mills J, Usher K, Park T. Discharge planning in mental health care: an integrative review of the literature. *J. Clin. Nurs*. 2014 May;23(9-10):1175-85.
7. National Institute for Health and Care Excellence (2017). Discharge from inpatient mental health services to community or care home support [NICE Quality Standard No.159] <https://www.nice.org.uk/guidance/qs159>
8. Care Quality Commission. Monitoring the Mental Health Act in 2017/18. 2019. Available from: [https://www.cqc.org.uk/sites/default/files/20190320\\_mhareport1718\\_report.pdf](https://www.cqc.org.uk/sites/default/files/20190320_mhareport1718_report.pdf)
9. Ådnanes M, Cresswell-Smith J, Melby L, Westerlund H, Šprah L, Sfetcu R, Straßmayr C, Donisi V. Discharge planning, self-management, and community support: Strategies to avoid psychiatric rehospitalisation from a service user perspective. *Patient Edu Couns*. 2019 Dec 5.
10. Wright N, Rowley E, Chopra A, Gregoriou K, Waring J. From admission to discharge in mental health services: a qualitative analysis of service user involvement. *Health Expect*. 2016 Apr;19(2):367-76.
11. King EA, Baldwin DS, Sinclair JM, Campbell MJ. The Wessex recent in-patient suicide study, 2: Case-control study of 59 in-patient suicides. *BJPsych*. 2001 Jun;178(6):537-42.
12. Yim PH, Yip PS, Li RH, Dunn EL, Yeung WS, Miao YK. Suicide after discharge from psychiatric inpatient care: a case-control study in Hong Kong. *Aust N Z J Psychiatry*. 2004 Jan;38(1-2):65-72.
13. Mind. One In Three People Sent Home From Hospital Too Early – With No Plan For Further Mental Health Care United Kingdom: Mind. Available from: <https://www.mind.org.uk/news-campaigns/news/one-in-three-people-sent-home-from-hospital-too-early-with-no-plan-for-further-mental-health-care>
14. Tyler N, Wright N, Waring J. Interventions to improve discharge from acute adult mental health inpatient care to the community: systematic review and narrative synthesis. *BMC health Serv. Res*. 2019 Dec 1;19(1):883.
15. Moore, G. F., Evans, R. E., Hawkins, J., Littlecott, H., Melendez-Torres, G. J., Bonell, C., & Murphy, S. (2019). From complex social interventions to interventions in complex social systems: Future directions and unresolved questions for intervention development and evaluation. *Evaluation*, 25(1), 23–45.
16. Rutter H, Savona N, Glonti K, Bibby J, Cummins S, Finegood DT, Greaves F, Harper L, Hawe P, Moore L, Petticrew M. The need for a complex systems model of evidence for public health. *Lancet*. 2017 Dec 9;390(10112):2602-4.

17. De Savigny D. Systems thinking for strengthening health systems in LMICs: need for a paradigm shift. *Health Policy Plan*. 2012 Oct 1;27(suppl\_4):iv1-3.
18. Carey G, Malbon E, Carey N, Joyce A, Crammond B, Carey A. Systems science and systems thinking for public health: a systematic review of the field. *BMJ Open*. 2015 Dec 1;5(12):e009002.
19. Komashie A, Ward J, Bashford T, Dickerson T, Kaya GK, Liu Y, Kuhn I, Günay A, Kohler K, Boddy N, O'Kelly E, Masters J, Dean J, Meads C, Clarkson J. Systems approach to health service design, delivery and improvement: a systematic review and meta-analysis. *BMJ open*. 2021 Jan 1;11(1):e037667.
20. McNab D, McKay J, Shorrock S, Luty S, Bowie P. Development and application of 'systems thinking' principles for quality improvement. *BMJ Open Qual*. 2020 Mar 1;9(1):e000714.
21. Sturmberg JP, Martin CM, Katerndahl DA. Systems and complexity thinking in the general practice literature: an integrative, historical narrative review. *The Annals of Family Medicine*. 2014 Jan 1;12(1):66-74.
22. Pawson R. Evidence-based policy: a realist perspective. London: Sage Publications, 2006. ISBN 1-4129-1059-5
23. Pawson R, Tilley N. Realistic evaluation. London: Sage Publications 1997. ISBN 0-7619-5008-7
24. Dalkin SM, Greenhalgh J, Jones D, Cunningham B, Lhussier M. What's in a mechanism? Development of a key concept in realist evaluation. *Implement. Sci*. 2015 Dec;10(1):1-7.
25. Rustagi AS, Gimbel S, Nduati R, de Fatima Cuembelo M, Wasserheit JN, Farquhar C, Gloyd S, Sherr K, With input from the SAIA Study Team. Impact of a systems engineering intervention on PMTCT service delivery in Cote d'Ivoire, Kenya, Mozambique: A cluster randomized trial. *JAIDS*. (1999). 2016 Jul 1;72(3):e68.
26. Loh HP, de Korne DF, Chee SP, Mathur R. Reducing wrong intraocular lens implants in cataract surgery. *IJQHC*. 2017 Aug; 30: 492–505.
27. Catchpole K, Ley E, Wiegmann D, Blaha J, Shouhed D, Gangi A, Blocker R, Karl R, Karl C, Taggart B, Starnes B. A human factors subsystems approach to trauma care. *JAMA surg*. 2014 Sep 1;149(9):962-8.
28. Clarkson PJ, Bogle D, Dean J, Tooley M, Trewby J, Vaughan L, Adams E, Dudgeon P, Platt N, Shelton P. Engineering better care: A systems approach to health and care design and continuous improvement. 2017. Available at: <https://www.raeng.org.uk/publications/reports/engineering-better-care>
29. Medical Research Council. (2006). MRC Developing and evaluating complex interventions. Medical Research Council, 1–39. [www.mrc.ac.uk/complexinterventionsguidance](http://www.mrc.ac.uk/complexinterventionsguidance)
30. Gajwani R, Parsons H, Birchwood M, Singh SP. Ethnicity and detention: are Black and minority ethnic (BME) groups disproportionately detained under the Mental Health Act 2007? *Soc Psychiatry Psychiatr Epidemiol*. 2016 May 1;51(5):703-11.
31. Morgan C, Mallett R, Hutchinson G, Leff J. Negative pathways to psychiatric care and ethnicity: the bridge between social science and psychiatry. *Soc. Sci. Med*. 2004 Feb 1;58(4):739-52.
32. Singh SP, Greenwood NA, White S, Churchill R. Ethnicity and the mental health act 1983: systematic review. *BJ Psych*. 2007 Aug;191(2):99-105.
33. Bhui K, Stansfeld S, Hull S, Priebe S, Mole F, Feder G. Ethnic variations in pathways to and use of specialist mental health services in the UK: systematic review. *BJ Psych*. 2003 Feb;182(2):105-16.
34. Manzano, A. (2022). Conducting focus groups in realist evaluation. *Evaluation*, 13563890221124637.
35. Yin R. Case study research: design and methods 5th ed. Los Angeles, California: SAGE. 2013.

- 1  
2  
3 36. Manzano A. The craft of interviewing in realist evaluation. *Evaluation*. 2016 Jul;22(3):342-60.
- 4 37. Kaminskiy E, Finlay M. It Does Take Two to Tango: An Applied Conversation Analysis of  
5 Interactions between a Psychiatrist and Service-Users Discussing Medication. *Health*  
6 *Commun*. 2018 Sep 12.
- 7  
8 38. Gillard S, Simons L, Turner K, Lucock M, Edwards C. Patient and public involvement in the  
9 coproduction of knowledge: reflection on the analysis of qualitative data in a mental health  
10 study. *Qual. Health Res*. 2012 Aug;22(8):1126-37.
- 11 39. Handley M, Bunn F, Lynch J, Goodman C. Using non-participant observation to uncover  
12 mechanisms: Insights from a realist evaluation. *Evaluation*. 2020 Jul;26(3):380-93.
- 13 40. Wong G, Westhorp G, Manzano A, Greenhalgh J, Jagosh J, Greenhalgh T. RAMESES II  
14 reporting standards for realist evaluations. *BMC Med*. 2016 Dec;14(1):1-8.
- 15 41. QSR International Pty Ltd. (2018) NVivo (Version 12),  
16 <https://www.qsrinternational.com/nvivo-qualitative-data-analysis-software/home>
- 17 42. Clarkson, PJ. iitoolkit.com [Internet]. Improving Improvement. A toolkit for Engineering  
18 Better Care. 2019. Available from: <http://www.iitoolkit.com/>
- 19 43. Mulder, P. (2017). MoSCoW Method. Retrieved 14/11/22 from Toolshero:  
20 <https://www.toolshero.com/project-management/moscow-method/>
- 21 44. Curtis L, Burns, A. Unit Costs of Health and Social Care. Personal Social Services Research  
22 Unit, University of Kent, Canterbury. 2019. Available from: [https://www.pssru.ac.uk/project-](https://www.pssru.ac.uk/project-pages/unit-costs/unit-costs-2019/)  
23 [pages/unit-costs/unit-costs-2019/](https://www.pssru.ac.uk/project-pages/unit-costs/unit-costs-2019/)
- 24 45. Powell, B. J., Waltz, T. J., Chinman, M. J., Damschroder, L. J., Smith, J. L., Matthieu, M. M., ...  
25 & Kirchner, J. E. (2015). A refined compilation of implementation strategies: results from the  
26 Expert Recommendations for Implementing Change (ERIC) project. *Implement. Sci*. 10(1), 1-  
27 14.
- 28 46. Colling C, Khondoker M, Patel R, Fok M, Harland R, Broadbent M, McCrone P, Stewart R.  
29 Predicting high-cost care in a mental health setting. *B J Psych Open*. 2020 Jan 17;6(1):e10.  
30 doi: 10.1192/bjo.2019.96. PMID: 31950891; PMCID: PMC7001466
- 31 47. John A, DelPozo-Banos M, Gunnell D, Dennis M, Scourfield J, Ford DV, Kapur N, Lloyd K.  
32 Contacts with primary and secondary healthcare prior to suicide: case-control whole-  
33 population-based study using person-level linked routine data in Wales, UK, 2000-2017. *BJ*  
34 *Psych*. 2020 Dec;217(6):717-724. doi: 10.1192/bjp.2020.137. PMID: 32744207; PMCID:  
35 PMC7705668.
- 36 48. DelPozo-Banos M, Lee SC, Friedmann Y, Akbari A, Torabi F, Lloyd K, et al. (2022) Healthcare  
37 contacts with self-harm during COVID-19: An echort whole-population-based study using  
38 individual-level linked routine electronic health records in Wales, UK, 2016—March 2021.  
39 *PLoS One* 17(4): e0266967. <https://doi.org/10.1371/journal.pone.0266967>  
40  
41  
42  
43  
44  
45  
46  
47  
48  
49  
50  
51  
52  
53  
54  
55  
56  
57  
58  
59  
60

Figure 1

Figure 1, Recruitment Aims across Work Packages

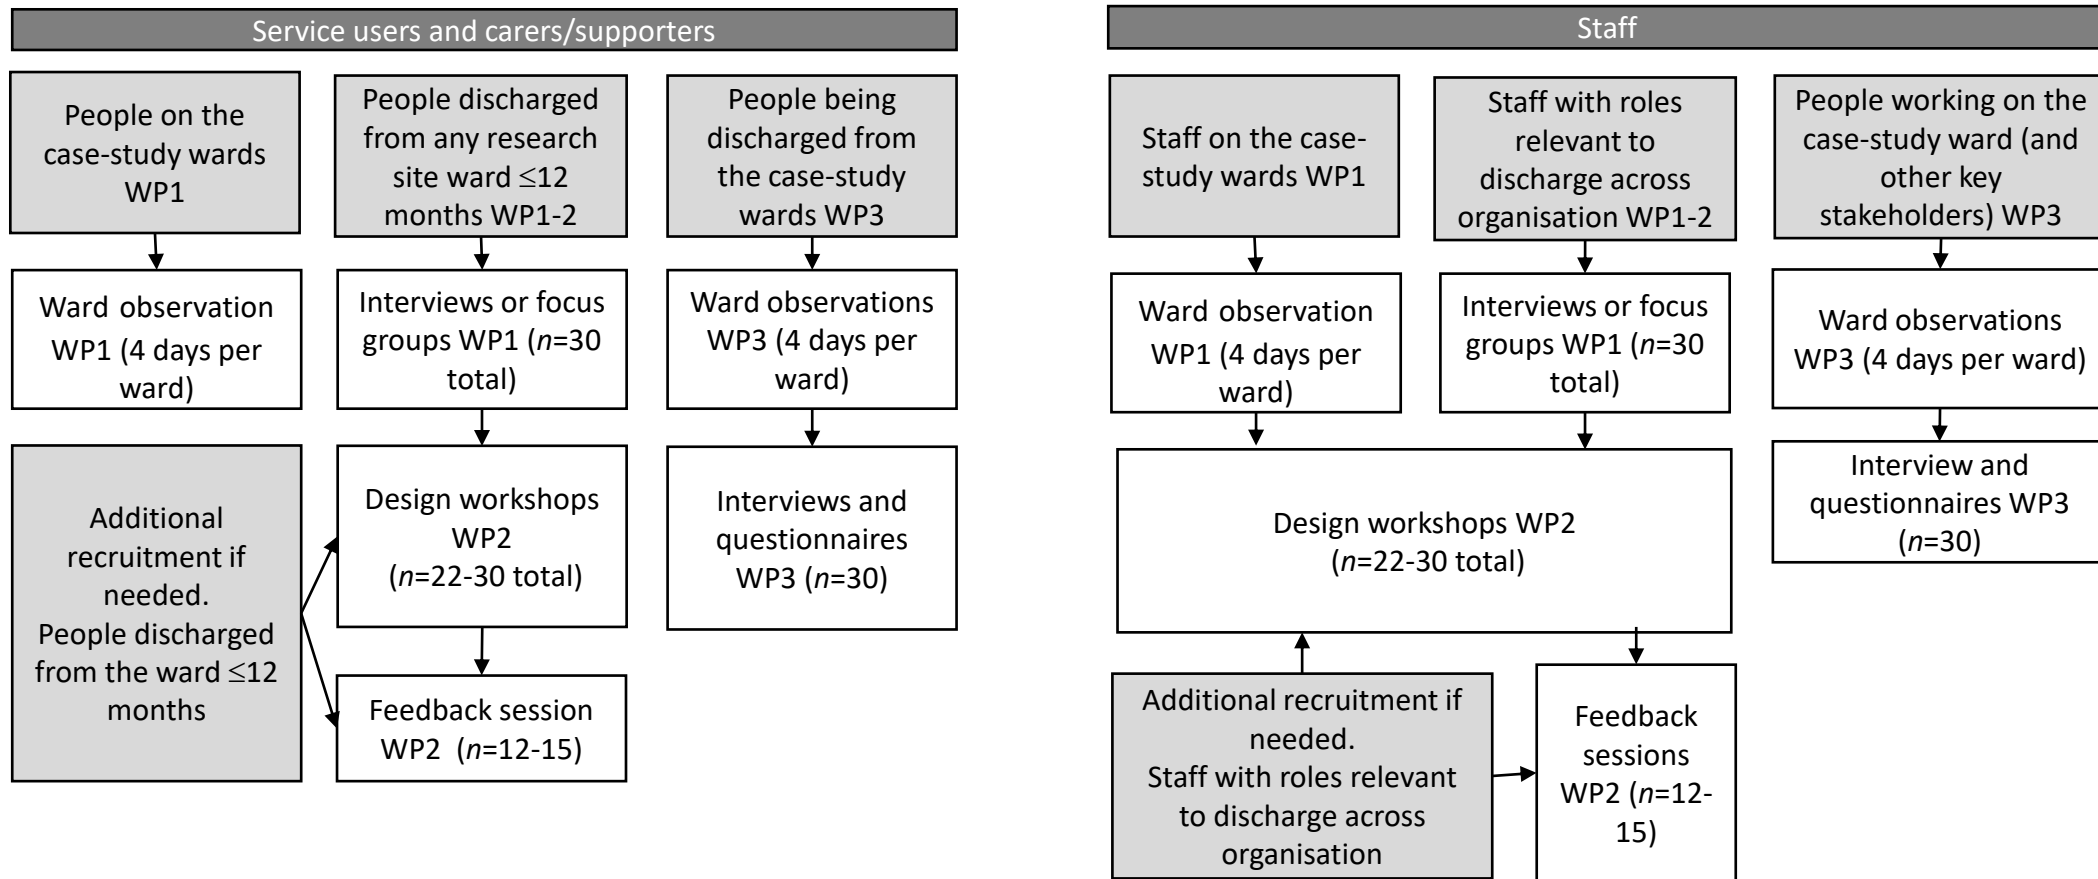

# BMJ Open

## Co-designing a systemic mental health inpatient discharge intervention (MINDS): a protocol for integrating realist evaluation and an engineering-based systems approach

|                                 |                                                                                                                                                                                                                                                                                                                                                                                                                                                                                                                                                                                                                                                                                                                                                                                                                                                                                                                                                                                                                                                                                                                                                                                                                                                                                                                                                                                                                                                                                                                                                                                                                                                                                                                               |
|---------------------------------|-------------------------------------------------------------------------------------------------------------------------------------------------------------------------------------------------------------------------------------------------------------------------------------------------------------------------------------------------------------------------------------------------------------------------------------------------------------------------------------------------------------------------------------------------------------------------------------------------------------------------------------------------------------------------------------------------------------------------------------------------------------------------------------------------------------------------------------------------------------------------------------------------------------------------------------------------------------------------------------------------------------------------------------------------------------------------------------------------------------------------------------------------------------------------------------------------------------------------------------------------------------------------------------------------------------------------------------------------------------------------------------------------------------------------------------------------------------------------------------------------------------------------------------------------------------------------------------------------------------------------------------------------------------------------------------------------------------------------------|
| Journal:                        | <i>BMJ Open</i>                                                                                                                                                                                                                                                                                                                                                                                                                                                                                                                                                                                                                                                                                                                                                                                                                                                                                                                                                                                                                                                                                                                                                                                                                                                                                                                                                                                                                                                                                                                                                                                                                                                                                                               |
| Manuscript ID                   | bmjopen-2022-071272.R1                                                                                                                                                                                                                                                                                                                                                                                                                                                                                                                                                                                                                                                                                                                                                                                                                                                                                                                                                                                                                                                                                                                                                                                                                                                                                                                                                                                                                                                                                                                                                                                                                                                                                                        |
| Article Type:                   | Protocol                                                                                                                                                                                                                                                                                                                                                                                                                                                                                                                                                                                                                                                                                                                                                                                                                                                                                                                                                                                                                                                                                                                                                                                                                                                                                                                                                                                                                                                                                                                                                                                                                                                                                                                      |
| Date Submitted by the Author:   | 27-Mar-2023                                                                                                                                                                                                                                                                                                                                                                                                                                                                                                                                                                                                                                                                                                                                                                                                                                                                                                                                                                                                                                                                                                                                                                                                                                                                                                                                                                                                                                                                                                                                                                                                                                                                                                                   |
| Complete List of Authors:       | Hackmann, Corinna; Norfolk and Suffolk NHS Foundation Trust, Research and Development<br>Komashie, Alexander; University of Cambridge School of Technology, Department of Engineering<br>Handley, Melanie; University of Hertfordshire, CRIPACC<br>Murdoch, Jamie; King's College London, School of Life Course and Population Sciences,<br>Wagner, Adam; NIHR Collaboration for Leadership in Applied Health Research & Care (CLAHRC) East of England, ; University of East Anglia, Norwich Medical School<br>Grünwald, Lisa Marie; Norfolk and Suffolk Foundation Trust<br>Waller, Sam; University of Cambridge, Engineering Design Centre<br>Kaminskiy, Emma; Anglia Ruskin University, School of Psychology and Sports Science<br>Zeilig, Hannah; University of the Arts London, London College of Fashion<br>Jones, Julia; University of Hertfordshire, Centre for Research in Primary & Community Care<br>Bray, Joy; Independant<br>Bagge, Sophie; Norfolk and Suffolk NHS Foundation Trust<br>Simpson, Alan; King's College London, Health Services and Population Research; King's College London<br>Dalkin, Sonia; Northumbria University, Faculty of Health and Life Sciences<br>Clarkson, John; University of Cambridge, Engineering Design Centre<br>Borghini, Giovanni; Hertfordshire and Peterborough NHS Foundation Trust<br>Kipouros, Timoleon; University of Cambridge, Department of Engineering<br>Rohricht, Frank ; East London NHS Foundation Trust<br>Taousi, Zohra; Hertfordshire and Peterborough NHS Foundation Trust<br>Haighton, Catherine ; Northumbria University,<br>Rae, Sarah; Cambridgeshire and Peterborough NHS Foundation Trust<br>Wilson, Jon; Norfolk and Suffolk NHS Foundation Trust, |
| <b>Primary Subject Heading</b>: | Mental health                                                                                                                                                                                                                                                                                                                                                                                                                                                                                                                                                                                                                                                                                                                                                                                                                                                                                                                                                                                                                                                                                                                                                                                                                                                                                                                                                                                                                                                                                                                                                                                                                                                                                                                 |
| Secondary Subject Heading:      | Health services research                                                                                                                                                                                                                                                                                                                                                                                                                                                                                                                                                                                                                                                                                                                                                                                                                                                                                                                                                                                                                                                                                                                                                                                                                                                                                                                                                                                                                                                                                                                                                                                                                                                                                                      |
| Keywords:                       | MENTAL HEALTH, QUALITATIVE RESEARCH, Adult psychiatry < PSYCHIATRY                                                                                                                                                                                                                                                                                                                                                                                                                                                                                                                                                                                                                                                                                                                                                                                                                                                                                                                                                                                                                                                                                                                                                                                                                                                                                                                                                                                                                                                                                                                                                                                                                                                            |

1  
2  
3  
4  
5  
6  
7  
8  
9  
10  
11  
12  
13  
14  
15  
16  
17  
18  
19  
20  
21  
22  
23  
24  
25  
26  
27  
28  
29  
30  
31  
32  
33  
34  
35  
36  
37  
38  
39  
40  
41  
42  
43  
44  
45  
46  
47  
48  
49  
50  
51  
52  
53  
54  
55  
56  
57  
58  
59  
60

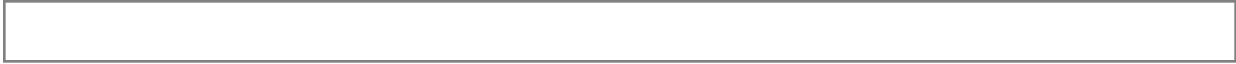

SCHOLARONE™  
Manuscripts

**Title**

Co-designing a systemic mental health inpatient discharge intervention (MINDS): a protocol for integrating realist evaluation and an engineering-based systems approach

**Full name, postal address and e-mail of the corresponding author**

Corinna Hackmann  
Research and Development Dept  
Norfolk and Suffolk Foundation Trust  
Hellesdon Hospital  
Drayton High Road  
NR6 5BE

Email: [Corinna.hackmann@nsft.nhs.uk](mailto:Corinna.hackmann@nsft.nhs.uk)

Telephone number: 07946 355725

**Email address for each author**

Alexander Komashie: [ak670@cam.ac.uk](mailto:ak670@cam.ac.uk)  
Melanie Handley: [m.j.handley@herts.ac.uk](mailto:m.j.handley@herts.ac.uk)  
Jamie Murdoch: [jamie.murdoch@kcl.ac.uk](mailto:jamie.murdoch@kcl.ac.uk)  
Adam P Wagner: [Adam.Wagner@uea.ac.uk](mailto:Adam.Wagner@uea.ac.uk)  
Lisa Grunwald: [Lisa.Grunwald@nsft.nhs.uk](mailto:Lisa.Grunwald@nsft.nhs.uk)  
Sam Waller: [sdw32@cam.ac.uk](mailto:sdw32@cam.ac.uk)  
Emma Kaminskiy: [emma.kaminskiy@aru.ac.uk](mailto:emma.kaminskiy@aru.ac.uk)  
Hannah Zeilig: [h.zeilig@fashion.arts.ac.uk](mailto:h.zeilig@fashion.arts.ac.uk)  
Julia Jones: [j.jones26@herts.ac.uk](mailto:j.jones26@herts.ac.uk)  
Joy Bray: [joy.bray@talktalk.net](mailto:joy.bray@talktalk.net)  
Sophie Bagge: [Sophie.Bagge@nsft.nhs.uk](mailto:Sophie.Bagge@nsft.nhs.uk)  
Alan Simpson: [alan.simpson@kcl.ac.uk](mailto:alan.simpson@kcl.ac.uk)  
Sonia Dalkin: [s.dalkin@northumbria.ac.uk](mailto:s.dalkin@northumbria.ac.uk)  
John Clarkson: [pjc10@cam.ac.uk](mailto:pjc10@cam.ac.uk)  
Giovanni Borghini: [g.borghini@nhs.net](mailto:g.borghini@nhs.net)  
Timoleon Kipouros: [tk291@cam.ac.uk](mailto:tk291@cam.ac.uk)  
Frank Röhricht: [frank.rohricht@nhs.net](mailto:frank.rohricht@nhs.net)  
Zohra Taousi: [z.taousi@nhs.net](mailto:z.taousi@nhs.net)  
Catherine Haighton: [Katie.haighton@northumbria.ac.uk](mailto:Katie.haighton@northumbria.ac.uk)  
Sarah Rae: [sarah.rae@rockyroad.org.uk](mailto:sarah.rae@rockyroad.org.uk)  
Jon Wilson: [Jon.Wilson@nsft.nhs.uk](mailto:Jon.Wilson@nsft.nhs.uk)

**Full name, department, institution, city and country of all co-authors**

Corinna Hackmann,<sup>1,2</sup> Alexander Komashie,<sup>3,4</sup> Melanie Handley,<sup>5</sup> Jamie Murdoch,<sup>6</sup> Adam P Wagner,<sup>2,7</sup> Lisa Grunwald,<sup>1</sup> Sam Waller,<sup>3</sup> Emma Kaminskiy,<sup>8</sup> Hannah Zeilig,<sup>9</sup> Julia Jones,<sup>5</sup> Joy Bray, Sophie Bagge,<sup>1</sup> Alan Simpson,<sup>10</sup> Sonia Dalkin,<sup>11</sup> John Clarkson,<sup>3</sup> Giovanni Borghini,<sup>12</sup> Timos Kipouros,<sup>3</sup> Frank Röhricht,<sup>13,14</sup> Zohra Taousi,<sup>12</sup> Catherine Haighton,<sup>11</sup> Sarah Rae\*, Jon Wilson\*<sup>1,2</sup>

\* Sarah Rae and Jon Wilson are joint senior authors

1. Norfolk and Suffolk NHS Foundation Trust, Norwich, UK
2. Norwich Medical School, University of East Anglia, Norwich, UK
3. Engineering Design Centre, Department of Engineering, University of Cambridge, Cambridge, UK
4. The Healthcare Improvement Studies (THIS) Institute, University of Cambridge, Cambridge, UK
5. Centre for Research in Public Health & Community Care (CRIPACC), University of Hertfordshire, Hatfield, UK
6. School of Life Course and Population Sciences, King's College London, London, UK
7. National Institute for Health Research (NIHR) Applied Research Collaboration (ARC) East of England (EoE), Cambridge, UK
8. School of Psychology and Sports Science, Anglia Ruskin University, Cambridge, UK
9. London College of Fashion, University of the Arts, London, UK
10. Florence Nightingale Faculty of Nursing, Midwifery and Palliative Care, King's College London, London, UK
11. Faculty of Health and Life Sciences, Northumbria University Faculty of Health and Life Sciences, Newcastle upon Tyne, UK
12. Hertfordshire Partnership University NHS Foundation Trust
13. East London NHS Foundation Trust, London, UK
14. Wolfson Institute of Population Health, Queen Mary University of London, London, UK

Joy Bray and Sarah Rae are independent

### **Word count, excluding title page, abstract, references, figures and table**

Word Count: 5345 words.

### **Keywords**

- Mental health
- Hospital discharge
- Co-production
- Systems approach
- Realist research
- Socio-technical system



## ABSTRACT

### Introduction

Transition following discharge from mental health hospital is high risk in terms of relapse, readmission, and suicide. Discharge planning supports transition and reduces risk. It is a complex activity involving interacting systemic elements. The MINDS study aims to improve the process for people being discharged, their carers/supporters and staff who work in mental health services, by understanding, co-designing and evaluating implementation of a systemic approach to discharge planning.

### Methods and analysis

The MINDS study integrates realist research and an engineering-informed systems approach across three stages. Stage 1 applies realist review and evaluation using a systems approach to develop programme theories of discharge planning. Stage 2 uses an Engineering Better Care framework to co-design a novel systemic discharge intervention, which will be subject to process and economic evaluation in Stage 3. The programme theories and resulting care planning approach will be refined throughout the study ready for a future clinical trial. MINDS is co-led by an expert by experience, with researchers with lived experience co-leading each stage.

### Ethics and dissemination

MINDS stage 1 has received ethical approval from Yorkshire & The Humber - Bradford Leeds (Research Ethics Committee (22/YH/0122)). Findings from MINDS will be disseminated via high impact journal publications and conference presentations, including those with service user and mental health professional audiences. We will establish routes to engage with public and service user communities and NHS professionals including blogs, podcasts and short videos.

### Registration

MINDS is funded by the National Institute of Health Research (NIHR 133013) <https://fundingawards.nihr.ac.uk/award/NIHR133013> The realist review protocol is registered on PROSPERO (CRD42021293255).

## STRENGTHS AND LIMITATIONS OF THIS STUDY

- MINDS was conceived from lived experience and is aiming for high standards of co-production
- MINDS incorporates realist methods with a systems-based engineering approach to understand and improve discharge experience and outcomes
- The complexity and pace of delivery and funding constraints might be barriers to co-production, but the team have extensive experience, is evaluating levels of co-production and will report these
- Some aspects of the MINDS project, including the translation of lived experience into outputs, are flexible and responsive to emerging discoveries; consequently, there may be refinements to the protocol – these will be outlined in related MINDS publications

## INTRODUCTION

The transition period following discharge is high risk; around 13% of people are quickly readmitted<sup>1</sup> and rates of suicide have been found to be 191 times higher for working age adults compared to

1  
2  
3 matched-age comparators.<sup>2</sup> A wide range of factors contribute to relapse following discharge,  
4 including feeling overwhelmed, managing mental health symptoms, returning to roles and day-to-day  
5 pressures of life.<sup>3,4,5</sup> Discharge planning supports transition and reduces risk by identifying post-  
6 discharge needs and how to manage these.<sup>3,6</sup> National Institute of Health and Care Excellence (NICE)  
7 guidance and the Care Quality Commission identify that discharge planning should be collaborative  
8 and person centred<sup>7,8</sup> but provide limited clarity on how this should be achieved.

9  
10  
11 Evidence suggests that discharge is often inadequately planned with little involvement from the  
12 person being discharged and their carers/supporters, resulting in poor transition and increased risk.<sup>9-</sup>  
13 <sup>12</sup>The charity Mind surveyed 1,221 people who had experienced discharge finding that 33% were given  
14 either no or insufficient notice of discharge, and for 37% there was no plan post discharge.<sup>13</sup>

15  
16 Discharge planning is complex and involves many multi-faceted interacting systemic elements. People  
17 are heterogenous in terms of needs. Mental health service delivery is reliant on the reasoning,  
18 reactions and actions of staff, which are influenced by the wider system. Discharge planning therefore  
19 needs to address the needs of the person being discharged while working within organisational  
20 complexity, constraints and priorities.

21  
22  
23 Previous interventions neglect complex systemic factors that either support or undermine discharge  
24 planning.<sup>14</sup> Neglecting the wider system, including systemic pressures and the needs of staff, is likely  
25 to explain why previous attempts to improve discharge have failed. To establish effective discharge  
26 planning procedures, it is critical to understand the ward as a complex system (operating within wider  
27 systems and national policy). Acknowledging such complexity reframes health services research “from  
28 investigations of complex social interventions to interventions in complex social systems”,<sup>15</sup> echoing  
29 perspectives articulated across public health and global health systems research.<sup>16,17</sup> Despite growing  
30 recognition of the need for systems approaches in healthcare,<sup>18-21</sup> to date no research has used this to  
31 improve mental health discharge.

## 32 33 34 35 **METHODS AND ANALYSIS**

### 36 37 **Study design**

38 The MINDS study commenced 01/01/2022 and ends 01/01/2025. The MINDS study will innovatively  
39 integrate realist research and an engineering-informed systems approach to co-design a systemic  
40 approach to discharge. Realist reviews<sup>22</sup> and evaluations<sup>23</sup> can be foundational for complex  
41 intervention development as they explain how and why change occurs through causal mechanisms.<sup>24</sup>  
42 Discharge planning is a multifaceted activity involving many systemic elements including service users,  
43 healthcare staff, policy, documentation, information systems and external bodies. We will use a  
44 healthcare-based systems approach as a framework for building and refining programme theories of  
45 discharge planning that set out relationships of components across system-levels in a socio-technical  
46 context (that is, people interacting with each other and technical components such as electronic  
47 records). This will comprise multiple context-mechanism-outcome configurations to explain what  
48 works, for whom and in what circumstances. The programme theories will inform system design  
49 solutions for discharge (see below for an example).

50  
51  
52 Engineering Better Care is an established engineering systems approach for the design of safe and  
53 successful healthcare delivery.<sup>25-27</sup> The framework involves four key perspectives:<sup>28</sup> 1) ‘People’  
54 focusses on the needs of key stakeholders; 2) ‘Systems’ explores the interactions between  
55 stakeholders and layers of the system; 3) ‘Design’ encourages innovation and investigates issues  
56 before proposing solutions; 4) ‘Risk’ predicts and models the risks associated with all proposed  
57 solutions. This framework will inform the co-design of a systemic approach to discharge.  
58 Implementation and economic implications will be evaluated to refine the discharge process.

1  
2  
3 Across the stages of the study, we will build evidence-based theories to co-design and trial a Systemic  
4 Discharge Approach that promotes collaborative discharge planning. For the purposes of this protocol,  
5 this will be referred to as 'the intervention'. It is anticipated that the intervention will be multifaceted,  
6 this may include training, changes to processes and documentation. It will be designed to address  
7 factors inhibiting collaborative discharge planning across the levels of the system with consideration  
8 to potential unintended consequences arising from new ways of working.  
9  
10

### 11 12 13 **Project aim**

14 Co-produce and evaluate implementation and cost impact of a systemic approach to discharge.  
15

### 16 **Project objectives**

- 17 1. **Understand** discharge planning as a complex intervention
- 18 2. **Co-design** a systemic discharge intervention
- 19 3. **Evaluate** acceptability, implementation, and cost-impact of the new discharge intervention  
20  
21

### 22 **Research questions**

- 23 1. How and in what contexts is mental health discharge currently performed?
- 24 2. Who are the primary stakeholders (e.g., service users,<sup>a</sup> carers/supporters, NHS staff), how can  
25 they be characterised, and what are their needs?
- 26 3. What are the successful outcomes for mental health discharge, how do these relate to  
27 contexts across the system, and what are the mechanisms underlying this?
- 28 4. How can mental health discharge be improved?
- 29 5. How can this be implemented and measured?  
30  
31  
32  
33  
34

### 35 **Patient and Public Involvement**

36 The MINDS study is co-led by SR, who conceived the idea from lived experience of unhelpful discharge.  
37 Each stage is co-led by researchers with relevant lived experience. MINDS includes a Lived Experience  
38 Advisory Group (LEAG) comprised of people with relevant lived experience or experience of being a  
39 significant carer or supporter. The LEAG will offer governance and support co-production and key  
40 strategic decision-making throughout the project. The study Steering Committee (SSC) includes two  
41 members with lived experience, one of whom is co-chair. The methodological approaches adopted  
42 align with current empirical healthcare research theory including MRC complex intervention  
43 guidance.<sup>29</sup> Systems and realist approaches were selected as they also intrinsically value and prioritise  
44 key stakeholder perspectives and an iterative approach to knowledge generation.  
45  
46  
47  
48

### 49 **Study sites**

50 Sites were purposively sampled to represent geographically distinct (serving rural and urban  
51 communities) statutory mental healthcare organisations with different demographic profiles and  
52 mixed public inspection ratings. Three mental healthcare sites are included. Two wards will be  
53 selected from each site for ward observations and evaluation of the new intervention. MINDS  
54  
55

---

56  
57 <sup>a</sup> The MINDS research team's preferred term for people who have lived experience of accessing mental  
58 services is 'people'. However, we have used the term 'service user' where discussing participants in the  
59 research project to delineate between different groups  
60

1  
2  
3 recognises that minority ethnic service users are disproportionately detained under the UK Mental  
4 Health Act<sup>30-32</sup> and overrepresented among psychiatric in-patients in UK statutory provision.<sup>33</sup>  
5 Consequently, we will monitor recruitment and employ targeted strategies to ensure the study sample  
6 reflects diversity of experience.  
7  
8  
9

## 10 **Recruitment**

11  
12 Figure 1 details recruitment aims across the MINDS project. There will be diverse promotion of the  
13 study to ensure broad access to participation, including (but not limited to) posters in clinical areas,  
14 participation newsletters, attendance at participation events. Additionally, eligible individuals may be  
15 contacted by their clinical team, or where they have signed-up to be contacted for research, by the  
16 research team to enquire if they are interested in participation.  
17  
18  
19  
20

21 Figure 1 [here]

22  
23 Figure 1, Recruitment aims across the three stages  
24  
25  
26

## 27 **Inclusion criteria**

### 28 **Service users**

29  
30 Interviews, focus groups and workshops: all service users (18 years and over), accessing community  
31 mental health services in the research sites, discharged within the previous 12 months (stage 1), or  
32 being discharged from a research site ward (stage 3), will be eligible.  
33  
34

35 Ward-based observations: all service users (18 years and over) currently admitted on selected wards.  
36  
37  
38

### 39 **Staff**

40 Staff, working in participating mental healthcare organisations, whose role impacts (directly or  
41 indirectly) on inpatient discharge.  
42  
43  
44

### 45 **Carers/supporters**

46  
47 Carers/supporters (people who identify as having a significant caring or supportive role) for people  
48 who have experienced inpatient discharge in one of the participating mental healthcare organisations  
49 within the last 12 months.  
50  
51  
52  
53  
54

## 55 **RESEARCH PLAN**

56  
57 The MINDS study operates across three stages.  
58  
59  
60

## Stage 1: Understand discharge planning as a complex intervention

### Aim

Build, test and refine evidence-based programme theories of discharge planning and preparation

### Objectives

- 1) Conduct a realist review integrating the Engineering Better Care systems approach to map and explain the relationship between key factors involved in discharge planning
- 2) Identify service user needs for discharge planning
- 3) Test programme theories in a realist evaluation across three case study sites
- 4) Refine programme theories to inform co-design work in stage 2

### Design

#### *Realist Review*

A realist review will synthesise quantitative and qualitative evidence on service user, carer, and staff experiences of, and interventions for, discharge planning. The review will result in evidence-based theories that include factors across all system levels to explain post-discharge outcomes. The review will consist of three iterative phases:

1) Defining review scope, concept mining and initial theory development: a series of meetings with the research team and LEAG will be used to define the system of interest. Initial programme theories will be developed from literature identified from a systematic review<sup>14</sup> and an internal systematic search with supplementary searches for existing programme theories of mental health discharge planning. This will involve extraction of data, initially from key papers, on contexts relevant to discharge planning, the outcomes relating to these contexts, and the mechanisms underlying the observed relationships between context and outcome. These will be formulated into 'IF, THEN, BECAUSE' statements, e.g., IF discharge is planned with involvement from service user, THEN the person is less likely to relapse post discharge, BECAUSE the discharge meets the needs of the service user. Numerous theories are likely to be identified, therefore the credibility and relevance to the scope of the review will be regularly assessed by the research team and LEAG members to retain the focus to the system of interest (i.e., mental health inpatient discharge planning). Programme theories will be mapped against the levels of the system to ensure sufficient spread and attention to factors relevant for subsequent stages of the study.

2) Theory testing and refinement: the core review team will test and refine the IF, THEN, BECAUSE statements iteratively against findings from additional research papers, this will include discussions with the wider research team and LEAG. There are inherent biases in the literature and the lived experience perspective will help ensure that theories are relevant to those accessing services.

3) Analysis and synthesis: The engineering-based systems approach will provide a framework for analysis to ensure; programme theories, articulated as Context-Mechanism-Outcome Configurations (CMOCs), map across macro, meso and micro levels of the system. An example of 'efficiency' is illustrated in see Figure 2 for how the concept might operate across the different system levels. Other factors might include risk management or social/clinical narrative about specific diagnoses). NVivo will be used to organise and track analysis. Tabulation and narrative write-up of evidence related to each programme theory will be shared with the research team and LEAG to support transparency and rigour

1  
2  
3 in the analysis process. For more detail see realist review protocol on PROSPERO (CRD42021293255).  
4

5  
6 Figure 2 [here]

7 Figure 2, Example of efficiency as a Context Mechanism Outcome Configuration across macro, meso  
8 and micro levels of the system  
9

### 10 11 12 *Realist Evaluation*

13  
14 We will conduct service user, carer and staff interviews, focus groups<sup>34</sup> and ward observations to  
15 refine the programme theories. An embedded case study design<sup>35</sup> will test programme theory  
16 components across systems within and between sites. Findings will be compared across the sites and  
17 participants to identify similarities and differences related to the CMOCs. We will look specifically to  
18 see how differences are linked to the contextual features of the sites and characteristics of the  
19 participants to understand how this affects the behaviour of mechanisms (i.e., in which circumstances  
20 are they triggered or not and with what outcome). This is key to ensuring transferability and  
21 acceptability of the new approach.  
22  
23

24 The interviews and focus groups will serve two purposes. Firstly, service users and carers will be asked  
25 about their experiences prior to, during and post the inpatient admission that relate to discharge  
26 planning. Staff will be asked to explain their role in the trust, any processes, resources, or strategies  
27 they use and their experiences of discharge planning with service users. This will establish the personal  
28 and professional context of participants and allow for new concepts to be identified. Secondly, the  
29 interviews and focus groups will take the form of a 'teacher-learner' cycle,<sup>36</sup> inviting participants to  
30 confirm, refute or expand components of the programme theories based on their experience.  
31 Participant deliberations of the programme theories will be contrast against the original assumptions  
32 to identify where there are disagreements and alternative explanations. This will strengthen  
33 understanding of how the context in which discharge planning takes place impacts service user and  
34 staff experience, thereby elucidating the circumstances in which mechanisms are triggered. Staff  
35 whose roles directly or indirectly impact discharge will be recruited across different levels of the  
36 system. Relevant sections of medical notes of service users recruited to interviews and focus groups  
37 (who consent to this) will be reviewed to further understand the discharge process. This includes data  
38 on route of admission, route of discharge, and any documentation of discharge planning and the  
39 discharge meeting. Anonymised data will be collected to provide aggregated service user  
40 characteristics and map the discharge process.  
41  
42  
43  
44  
45

46 Ward observations be conducted at each of the participating wards and will include observations in  
47 communal areas and of discharge conversations, relevant meetings, and ward rounds.<sup>37-39</sup> They aim  
48 to support understanding of interpersonal nuance, the way that contextual factors relate to outcomes  
49 and insights into causal mechanisms. Data will be collected using a template reflecting the programme  
50 theories. We will conduct a review of policy and strategy documents to provide an account of stated  
51 organisational aims and priorities for discharge and how documents are structured to support the  
52 process.  
53  
54  
55

### 56 57 *Analysis*

58 The analysis will follow Realist and Meta-narrative Evidence Syntheses: Evolving Standards quality  
59 standards,<sup>40</sup> using realist logic.<sup>22,23</sup> A core team will work with LEAG members to iteratively evaluate  
60

1  
2  
3 data in relation to the programme theories to facilitate theory refinement. NVivo<sup>41</sup> will support data  
4 management and analysis. Data coding will be deductive (informed by our initial programme theories),  
5 inductive (derived from the collected data) and reproductive (making inferences about mechanisms  
6 based on interpretations of our data to infer underlying causal processes). Evidence tables will be  
7 produced to demonstrate theory refinement.  
8  
9

## 10 11 12 Outputs

13 The outputs for stage 1 will include an evidence-based programme theories of discharge preparation  
14 and planning, a rich understanding of context, including the stakeholders involved and their wants  
15 and needs from the discharge process and a set of causal mechanisms operating within the discharge  
16 contexts.  
17  
18

## 19 20 **Stage 2: Co-design a systemic discharge intervention**

### 21 22 23 Aim

24 Informed by the programme theories, co-design a sustainable systemic discharge intervention that  
25 meets service user needs, is compatible with how staff work, and feasible to implement.  
26  
27  
28  
29

### 30 31 Objectives

32 Use a healthcare engineering-based systems approach as a framework to develop:

- 33 1) An agreed scope for the factors that can be changed within the discharge planning approach
- 34 2) A systemic discharge solution that has the potential to balance key wants and needs of all  
35 stakeholders
- 36 3) Methods for measuring the performance of the proposed solution against key wants and  
37 needs of service users and other stakeholders  
38  
39  
40

### 41 42 Design

43 Stage 2 uses the Engineering Better Care framework and Improving Improvement toolkit (IItoolkit,  
44 www.iitoolkit.com).<sup>42</sup> This is a systems-based engineering approach that aligns with complex  
45 intervention development, as it is non-linear, creative, and forward looking to future evaluation. The  
46 programme theories from stage 1 will provide an understanding of the context and definition of the  
47 problem across the wider system of interest (critical stages for EBC prior to designing the solution).  
48  
49  
50

### 51 52 Prioritisation Workshop

53 The wants and needs service users and other key stakeholders may conflict. In this case the research  
54 team and LEAG will review these, in combination with the agreed scope. The following structure  
55 (MoSCoW method)<sup>43</sup> will be used. This will categorise wants and needs into 'must haves' (core  
56 essential needs for an improved discharge process), 'should haves' (highest priority 'wants'), 'could  
57  
58  
59  
60

1  
2  
3 hases' (secondary priority 'wants'), and 'won't have' (rejected as being incompatible with the agreed  
4 scope).

5  
6 The prioritised wants and needs embody what a 'better' solution would mean, across the perspectives  
7 of stakeholders, whilst acknowledging the pragmatic reality of delivery and resource limitations.  
8  
9

### 10 11 Exploratory Design Workshops

12  
13 Iterative 3-hour exploratory design workshops will be conducted at each study site with service users,  
14 staff and carers/supporters. The research team will use the Itoolkit to develop ideas and proposals  
15 for an improved discharge process to meet the discharge needs of service users identified from the  
16 realist review and evaluation. The tools and activities within the Itoolkit will be used to support an  
17 iterative process of problem-finding and -solving, in a systems context. This encourages divergent  
18 thinking to stimulate ideas about how the discharge process can be improved, and convergent thinking  
19 to consider how these ideas can be selected, refined, and developed to produce a small set of feasible  
20 concepts. This will challenge the understanding and insights gathered from the realist evaluation and  
21 the scope of what can be delivered.  
22  
23  
24  
25  
26

### 27 Review and Refinement Workshop

28  
29 The exploratory design workshop outputs will be considered at two 3-hour sessions with the research  
30 team and LEAG. The research team and LEAG will review, refine and evaluate the ideas and concepts  
31 from the exploratory workshops, to give a recommended lead proposal for an improved discharge  
32 process. This may involve developing tools and/or materials to better assist discharge planning, and/or  
33 reconfiguring the discharge process and/or updating the guidance for the discharge process. Examples  
34 might include a combination of training materials, clinical supervision or reflective practice templates,  
35 a discharge planning group outline, or collaborative discharge planning tools or documentation. Team  
36 members involved in this work contribute skills in systems engineering, risk assessment and design,  
37 psychology, nursing, psychiatry and lived experience of discharge.  
38  
39  
40  
41  
42

### 43 Feedback Sessions

44  
45 The new discharge intervention will be reviewed and refined during feedback sessions, with service  
46 users, carers/supporters and clinical staff from the design workshops. This will focus on acceptability  
47 and implimentability of the new approach. Assessment will be based on the prioritised wants and  
48 needs that informed the design of the new intervention, together with the success measures. Staff  
49 will be asked to develop an implementation plan with the research team to support use of the new  
50 discharge approach on their ward. These plans will be taken to additional meetings with staff on the  
51 research wards to agree plans for implementation of the new approach on their wards.  
52  
53  
54

### 55 Explanatory Model

56  
57 The research team and LEAG members will agree how the proposed solution could be practically  
58 measured against agreed wants and needs. The programme theories, prioritised discharge needs  
59 and identified outcomes associated with these and the tools and/or materials for the new systemic  
60



1  
2  
3 discharge intervention will be used by the research team and LEAG to develop a realist-informed  
4 explanatory model including resources, activities, and measurable process indicators for  
5 implementation. This will include the components of the discharge intervention to be implemented,  
6 steps to implementation, process indicators of successful implementation, measures of  
7 acceptability, cost impact and outcomes of effective discharge. This will support data collection for  
8 stage 3  
9  
10

#### 11 12 13 Outputs

14  
15 The outputs for stage 2 will include a prioritised wants and needs for an improved discharge  
16 process, practical measures of success that are aligned with these prioritised wants and needs,  
17 the SDCA as an improved discharge process, and an explanatory model to support  
18 implementation and evaluation.  
19  
20

### 21 22 23 **Stage 3: Evaluate acceptability, implementation, and cost-impact of the new discharge intervention**

#### 24 25 26 Aims

- 27  
28 1) Evaluate acceptability and implementation of the discharge intervention  
29 2) Explore resource and cost implications, and determine feasibility of collecting data for a future  
30 economic evaluation  
31 3) Inform a final specification for the discharge intervention that can be tested in a future Hybrid Type  
32 II trial that will determine its effectiveness and impact, including economics.  
33  
34  
35

#### 36 37 Objectives

- 38 1) Understand acceptability, barriers, and facilitators to implementation of the SDCA  
39 2) Evaluate how delivery and fidelity is shaped by the healthcare context  
40 3) Measure reach, adoption, and maintenance  
41 4) Risk-assess the use of the intervention  
42 5) Estimate resource and associated costs impact  
43 6) Identify recommendations for optimisation, wider implementation, and future evaluation  
44 7) Evaluate feasibility of collecting service user outcome and economic evaluation data  
45  
46  
47

#### 48 49 Design

50  
51 The explanatory model will support implementation and a process evaluation for stage 3. A parallel,  
52 mixed methods process evaluation will assess the feasibility of implementation, acceptability, risks  
53 and benefits, and cost impact of the discharge intervention.  
54  
55

#### 56 57 Ward-based observations

58  
59 Ward-based observations will be conducted to investigate implementation of the discharge  
60 intervention and how this interacts with the ward and wider contexts. This will include observing

1  
2  
3 discharge planning consultations and system strengthening components (e.g., training) as well as  
4 ward-based processes that impact on delivery. Researchers will attend relevant meetings (e.g.,  
5 reviews and discharge planning meetings), observe training sessions or other relevant interactions  
6 and collect data in the form of field notes. This will evaluate whether the components of the discharge  
7 approach have fidelity in terms of what was designed in the workshops, and whether it impacts the  
8 areas of service user discharge need identified and prioritised from the programme theories.  
9  
10

### 11 12 13 Semi-structured interviews with service users, carers/supporters, and staff

14  
15 Interviews with service users will gain perspectives on the acceptability of the discharge intervention,  
16 with a specific focus on how the resulting discharge plan supported their transition from the ward to  
17 home, the quality of collaboration between themselves and ward staff, and whether their discharge  
18 plans were supportive of a safe and effective transition from the ward to home. This will be informed  
19 by the programme theories and prioritised needs. Interviews with staff will be carried out six months  
20 after commencing use of the discharge intervention to allow it to be embedded into routine practice,  
21 obtaining perspectives on acceptability, barriers and facilitators to implementation, impact on quality  
22 of care over time, and recommendations for wide-scale implementation. Interviews will be semi-  
23 structured with topic guides informed by the prioritised discharge needs of service users and possible  
24 barriers and facilitators in terms of implementation.  
25  
26  
27  
28  
29

### 30 Service user and outcome data

31 The feasibility of collecting service user demographics and outcome data from routine medical records  
32 and questionnaires will be assessed, including readmission, suicidality, mental health symptoms,  
33 personal recovery and quality of life. Participants will complete a questionnaire containing selected  
34 measures and resource use questions to inform data collection feasibility for future evaluation,  
35 resource use and associated cost analysis. This will include the outcome measures identified from the  
36 programme theories and a resource use questionnaire. Medical records will be reviewed to assess the  
37 reach, adoption, and maintenance of the discharge intervention.  
38  
39  
40  
41

### 42 Data Analysis

#### 43 *Qualitative analysis*

44  
45 Fieldnotes from the ward-based observations, the data from document reviews and interviews with  
46 staff and service users will be compared with the context-mechanism-outcome configurations  
47 identified in stage 1 and the realist-informed explanatory model to explore whether changes to  
48 practice occurred and met the prioritised needs as theorised. This will follow the realist logic of  
49 analysis used in stage 1. The observations and document review data will be used as measures of  
50 process indication for implementation identified in the explanatory model. This will indicate fidelity  
51 to implementation. We will also use descriptive analysis of the data from the document reviews to  
52 describe reach and adoptions (i.e., the extent of use and who it is being used with). The interviews  
53 evaluate how the process and content of the discharge intervention 'worked' from the participants'  
54 perspective, aiming to understand the quality of collaboration, usefulness of the discharge  
55 intervention, and barriers and facilitators to implementation. A constant comparison approach will be  
56 adopted, working iteratively between data obtained from different interviewees within and between  
57  
58  
59  
60

wards and sites. We will also analyse how different intervention components interact with relevant macro (e.g., national policy); meso (e.g., in-patient ward protocols, staff arrangements, other services); and micro (e.g., communication and behaviour within discharge planning encounters) contextual features relevant to scaled-up implementation. This will be undertaken with support of the LEAG.

### *Quantitative analysis*

Statistical analysis will include descriptive analyses of changes over time (e.g., numbers of discharge plans), and graphical plotting of changes, comparing trends between wards, both descriptively and potentially with regression. Additional analyses prompted by qualitative findings (e.g., effects of the discharge intervention on specific groups or diagnoses) will be explored. Completion rates and patterns of data collection tools will be descriptively analysed to inform the data collection feasibility for future trialling.

### *Resource use and costing analysis*

Recorded resource use will be multiplied by standard unit costs.<sup>44</sup> A key costing perspective will be that of the NHS and Social Services, but we will also disaggregate costs to consider those incurred by 1) the inpatient wards; 2) other providers; and 3) service users (e.g., out of pocket costs). This will consider which costs are one-off (e.g., training) and recurring across levels of the system. Return rates and levels/patterns of missing data on the resource use questions will be descriptively analysed to inform the feasibility of a future economic evaluation and refinements to the questionnaires to improve completion rates. Extraction of related data from routine sources will also be explored to further inform future evaluation.

### *Stakeholder focus groups*

Two stakeholder focus groups (6-8 participants per group, 12-16 in total) will be carried out towards the end of stage 3 to identify how to optimise the discharge intervention for wide-scale implementation and to determine priorities for a future trial. The key stakeholders will include a mixture of key stakeholders including mental health staff, service directors and policymakers who can provide critical insight on wider implementation. We will share findings and ask stakeholders to make recommendations for finalising the design and content of the SDCA and required system strengthening components to optimise intervention implementation. We will map components against the implementation strategies identified by the Expert Recommendations for Implementing Change<sup>45</sup> to finalise the SDCA.

### **Stage 3 Outputs**

The outputs for stage 3 will include a finalised systemic discharge intervention ready for implementation and trialling, refined programme theories setting out the factors necessary for implementation, estimation of the cost and resource impact, initial feasibility data for a Hybrid Type 2 trial of the intervention including identified service user outcomes, process/implementation indicators and economic measures.

## RECRUITMENT AND CONSENT

We are recruiting and consenting five groups of service users, carers/supporters, and staff (see Figure 1):

1. Service users who are currently admitted for the ward-based observations (stages 1 and 3)
2. Service users in the community who have had experience of discharge from a mental health ward within the last 12 months for interviews and focus groups (stages 1 and 2)
3. Service users who are being discharged (stage 3)
4. Carers/supporters of people who have been discharged in the last 12 months (stages 1, 2 and 3)
5. Staff who have roles that impact on inpatient discharge (stages 1, 2 and 3)

Recruitment of service users, carers/supporters and staff for interviews, surveys and groups will be purposive. The LEAG will advise on ways to maximise access and participation – including groups that may be at risk of under-representation due to diagnosis, ethnic background, or other demographic factors. Potential participants will be approached via multiple channels to increase access and participation, including, via clinical teams, through participation channels, and promotion including posters on wards and other service-user facing clinical spaces.

For interviews, focus groups and workshops, a research team member will arrange a consent meeting at least 48 hours after receipt of the Participant Information Sheet (PIS). It will be established that the participant has read this, understands the study and implications of participation and any questions are answered. Capacity to consent will be assessed.

On the days of the ward observation, information posters will be displayed in areas where the observations are taking place. All staff and service users will be given verbal information and a simplified PIS about the reason for the observations and be asked to verbally consent to the observations. This simplified consent process has been designed to minimise burden and confusion for service users. Observers will be wearing a lanyard that makes it clear who they are and that they are undertaking observations. If approached, they will answer questions transparently. Service users will be informed that they can choose to opt out of the observations at any time (they are also free to leave the observed space). Staff will be asked to opt out if they do not want to be observed. Staff will be informed that if they are concerned about observations including a particular service user, or if they become concerned about anybody during the observation, they can ask for the observation to be moved or terminated.

All service-users who are discharged from the 3 study sites within the first 6 months of stage 3 will be asked whether they wish to opt out of their routine data being used for research purposes.<sup>46-48</sup>

## ETHICS AND DISSEMINATION

MINDS includes protocols for managing distress or safety issues relating to interviews, focus groups and ward observations, that have received ethical approval for stage 1. These will also be applied to the activity for stages 2 & 3. The Study Steering Committee and LEAG will support ethical issues encountered during the study.

## Dissemination

We will work with the LEAG, to develop open access peer reviewed journal publications and conference presentations. We will establish routes to engage with public and service user communities including blogs, podcasts and videos via partner Mind and reaching out to other organisations e.g., National Survivor User Network (NSUN). This is NIHR Applied Research Collaboration (ARC) East of England (EoE) affiliated project and findings will be disseminated in an assessable form via ARC platforms and networks.

## Author Contributions

CHac took the lead role in design, coordinating the design and writing the protocol. MH, EK, JJ, HZ, SD and CHai led the design of stage 1. AK, CHac, SW, SB, TK and JC led the design of stage 2. JM and APW led the design of stage 3. SR, JW and LG contributed to the design across the project and the writing and editing of the protocol. SR, HZ and SB led on the lived-experience input to the conception and design across the project. JB, AS, JW, FR, GB, ZT and CHac led on clinical perspectives, clinical governance, distress management and staff input across the design of the protocol. All authors were involved in editing the protocol.

## Acknowledgements

We would like to thank LEAG members including Hajara Begum, Katie Fillingham, June Hanshaw, John Lucas, Isaac Samuels, and Roger Talbot for their ongoing input across the MINDS project; helping to ensure the processes and outputs reflect the experiences and needs of people with lived experience and their supporters.

## Funding statement

This work is funded by the NIHR (NIHR133013). APW is supported by the NIHR ARC EoE. The views expressed are those of the authors and not necessarily those of the NIHR or the Department of Health and Social Care.

## Competing interests statement

We declare no competing interests.

## REFERENCES

1. Vigod SN, Kurdyak PA, Dennis CL, Leszcz T, Taylor VH, Blumberger DM, Seitz DP. Transitional interventions to reduce early psychiatric readmissions in adults: systematic review. *BJ Psych*. 2013 Mar;202(3):187-94.
2. Musgrove, R., Carr, M. J., Kapur, N., Chew-graham, C. A., Mughal, F., Ashcroft, D. M., & Webb, R. T. (2022). Suicide and other causes of death among working- age and older adults

- 1  
2  
3 in the year after discharge from in-patient mental healthcare in England: matched cohort  
4 study. *BJ Psych.* 468–475. <https://doi.org/10.1192/bjp.2021.176>
- 5  
6 3. Mutschler C, Lichtenstein S, Kidd SA, Davidson L. Transition Experiences Following Psychiatric  
7 Hospitalization: A systematic Review of the Literature. *Community Ment. Health J.* 2019 Nov  
8 1;55(8):1255-74.
- 9  
10 4. Moreno C, Wykes T, Galderisi S, Nordentoft M, Crossley N, Jones N, Cannon M, Correll CU,  
11 Byrne L, Carr S, Chen EY. How mental health care should change as a consequence of the  
12 COVID-19 pandemic. *LANCET PSYCHIAT.* 2020 Jul 16.
- 13  
14 5. Mind. The mental health emergency: how has the coronavirus pandemic impacted our  
15 mental health? United Kingdom: Mind. Available from: [https://www.mind.org.uk/media-](https://www.mind.org.uk/media-a/5929/the-mental-health-emergency_a4_final.pdf)  
16 [a/5929/the-mental-health-emergency\\_a4\\_final.pdf](https://www.mind.org.uk/media-a/5929/the-mental-health-emergency_a4_final.pdf).
- 17  
18 6. Nurjannah I, Mills J, Usher K, Park T. Discharge planning in mental health care: an integrative  
19 review of the literature. *J. Clin. Nurs.* 2014 May;23(9-10):1175-85.
- 20  
21 7. National Institute for Health and Care Excellence (2017). Discharge from inpatient mental  
22 health services to community or care home support [NICE Quality Standard No.159]  
23 <https://www.nice.org.uk/guidance/qs159>
- 24  
25 8. Care Quality Commission. Monitoring the Mental Health Act in 2017/18. 2019. Available  
26 from: [https://www.cqc.org.uk/sites/default/files/20190320\\_mhareport1718\\_report.pdf](https://www.cqc.org.uk/sites/default/files/20190320_mhareport1718_report.pdf)
- 27  
28 9. Ådnanes M, Cresswell-Smith J, Melby L, Westerlund H, Šprah L, Sfetcu R, Straßmayr C, Donisi  
29 V. Discharge planning, self-management, and community support: Strategies to avoid  
30 psychiatric rehospitalisation from a service user perspective. *Patient Edu Couns.* 2019 Dec 5.
- 31  
32 10. Wright N, Rowley E, Chopra A, Gregoriou K, Waring J. From admission to discharge in mental  
33 health services: a qualitative analysis of service user involvement. *Health Expect.* 2016  
34 Apr;19(2):367-76.
- 35  
36 11. King EA, Baldwin DS, Sinclair JM, Campbell MJ. The Wessex recent in-patient suicide study, 2:  
37 Case–control study of 59 in-patient suicides. *BJPsych.* 2001 Jun;178(6):537-42.
- 38  
39 12. Yim PH, Yip PS, Li RH, Dunn EL, Yeung WS, Miao YK. Suicide after discharge from psychiatric  
40 inpatient care: a case-control study in Hong Kong. *Aust N Z J Psychiatry.* 2004 Jan;38(1-2):65-  
41 72.
- 42  
43 13. Mind. One In Three People Sent Home From Hospital Too Early – With No Plan For Further  
44 Mental Health Care United Kingdom: Mind. Available from: [https://www.mind.org.uk/news-](https://www.mind.org.uk/news-campaigns/news/one-in-three-people-sent-home-from-hospital-too-early-with-no-plan-for-further-mental-health-care)  
45 [campaigns/news/one-in-three-people-sent-home-from-hospital-too-early-with-no-plan-for-](https://www.mind.org.uk/news-campaigns/news/one-in-three-people-sent-home-from-hospital-too-early-with-no-plan-for-further-mental-health-care)  
46 [further-mental-health-care](https://www.mind.org.uk/news-campaigns/news/one-in-three-people-sent-home-from-hospital-too-early-with-no-plan-for-further-mental-health-care)
- 47  
48 14. Tyler N, Wright N, Waring J. Interventions to improve discharge from acute adult mental  
49 health inpatient care to the community: systematic review and narrative synthesis. *BMC*  
50 *health Serv. Res.* 2019 Dec 1;19(1):883.
- 51  
52 15. Moore, G. F., Evans, R. E., Hawkins, J., Littlecott, H., Melendez-Torres, G. J., Bonell, C., &  
53 Murphy, S. (2019). From complex social interventions to interventions in complex social  
54 systems: Future directions and unresolved questions for intervention development and  
55 evaluation. *Evaluation*, 25(1), 23–45.
- 56  
57 16. Rutter H, Savona N, Glonti K, Bibby J, Cummins S, Finegood DT, Greaves F, Harper L, Hawe P,  
58 Moore L, Petticrew M. The need for a complex systems model of evidence for public health.  
59 *Lancet.* 2017 Dec 9;390(10112):2602-4.
- 60  
61 17. De Savigny D. Systems thinking for strengthening health systems in LMICs: need for a  
62 paradigm shift. *Health Policy Plan.* 2012 Oct 1;27(suppl\_4):iv1-3.
- 63  
64 18. Carey G, Malbon E, Carey N, Joyce A, Crammond B, Carey A. Systems science and systems  
65 thinking for public health: a systematic review of the field. *BMJ Open.* 2015 Dec  
66 1;5(12):e009002.

19. Komashie A, Ward J, Bashford T, Dickerson T, Kaya GK, Liu Y, Kuhn I, Günay A, Kohler K, Boddy N, O'Kelly E, Masters J, Dean J, Meads C, Clarkson J. Systems approach to health service design, delivery and improvement: a systematic review and meta-analysis. *BMJ open*. 2021 Jan 1;11(1):e037667.
20. McNab D, McKay J, Shorrock S, Luty S, Bowie P. Development and application of 'systems thinking' principles for quality improvement. *BMJ Open Qual*. 2020 Mar 1;9(1):e000714.
21. Sturmberg JP, Martin CM, Katerndahl DA. Systems and complexity thinking in the general practice literature: an integrative, historical narrative review. *The Annals of Family Medicine*. 2014 Jan 1;12(1):66-74.
22. Pawson R. Evidence-based policy: a realist perspective. London: Sage Publications, 2006. ISBN 1-4129-1059-5
23. Pawson R, Tilley N. Realistic evaluation. London: Sage Publications 1997. ISBN 0-7619-5008-7
24. Dalkin SM, Greenhalgh J, Jones D, Cunningham B, Lhussier M. What's in a mechanism? Development of a key concept in realist evaluation. *Implement. Sci*. 2015 Dec;10(1):1-7.
25. Rustagi AS, Gimbel S, Nduati R, de Fatima Cuembelo M, Wasserheit JN, Farquhar C, Gloyd S, Sherr K, With input from the SAIA Study Team. Impact of a systems engineering intervention on PMTCT service delivery in Cote d'Ivoire, Kenya, Mozambique: A cluster randomized trial. *JAIDS*. (1999). 2016 Jul 1;72(3):e68.
26. Loh HP, de Korne DF, Chee SP, Mathur R. Reducing wrong intraocular lens implants in cataract surgery. *IJQHC*. 2017 Aug; 30: 492–505.
27. Catchpole K, Ley E, Wiegmann D, Blaha J, Shouhed D, Gangi A, Blocker R, Karl R, Karl C, Taggart B, Starnes B. A human factors subsystems approach to trauma care. *JAMA surg*. 2014 Sep 1;149(9):962-8.
28. Clarkson PJ, Bogle D, Dean J, Tooley M, Trewby J, Vaughan L, Adams E, Dudgeon P, Platt N, Shelton P. Engineering better care: A systems approach to health and care design and continuous improvement. 2017. Available at: <https://www.raeng.org.uk/publications/reports/engineering-better-care>
29. Medical Research Council. (2006). MRC Developing and evaluating complex interventions. Medical Research Council, 1–39. [www.mrc.ac.uk/complexinterventionsguidance](http://www.mrc.ac.uk/complexinterventionsguidance)
30. Gajwani R, Parsons H, Birchwood M, Singh SP. Ethnicity and detention: are Black and minority ethnic (BME) groups disproportionately detained under the Mental Health Act 2007? *Soc Psychiatry Psychiatr Epidemiol*. 2016 May 1;51(5):703-11.
31. Morgan C, Mallett R, Hutchinson G, Leff J. Negative pathways to psychiatric care and ethnicity: the bridge between social science and psychiatry. *Soc. Sci. Med*. 2004 Feb 1;58(4):739-52.
32. Singh SP, Greenwood NA, White S, Churchill R. Ethnicity and the mental health act 1983: systematic review. *BJ Psych*. 2007 Aug;191(2):99-105.
33. Bhui K, Stansfeld S, Hull S, Priebe S, Mole F, Feder G. Ethnic variations in pathways to and use of specialist mental health services in the UK: systematic review. *BJ Psych*. 2003 Feb;182(2):105-16.
34. Manzano, A. (2022). Conducting focus groups in realist evaluation. *Evaluation*, 13563890221124637.
35. Yin R. Case study research: design and methods 5th ed. Los Angeles, California: SAGE. 2013.
36. Manzano A. The craft of interviewing in realist evaluation. *Evaluation*. 2016 Jul;22(3):342-60.
37. Kaminskiy E, Finlay M. It Does Take Two to Tango: An Applied Conversation Analysis of Interactions between a Psychiatrist and Service-Users Discussing Medication. *Health Commun*. 2018 Sep 12.

- 1  
2  
3  
4  
5  
6  
7  
8  
9  
10  
11  
12  
13  
14  
15  
16  
17  
18  
19  
20  
21  
22  
23  
24  
25  
26  
27  
28  
29  
30  
31  
32  
33  
34  
35  
36  
37  
38  
39  
40  
41  
42  
43  
44  
45  
46  
47  
48  
49  
50  
51  
52  
53  
54  
55  
56  
57  
58  
59  
60
38. Gillard S, Simons L, Turner K, Lucock M, Edwards C. Patient and public involvement in the coproduction of knowledge: reflection on the analysis of qualitative data in a mental health study. *Qual. Health Res.* 2012 Aug;22(8):1126-37.
  39. Handley M, Bunn F, Lynch J, Goodman C. Using non-participant observation to uncover mechanisms: Insights from a realist evaluation. *Evaluation.* 2020 Jul;26(3):380-93.
  40. Wong G, Westhorp G, Manzano A, Greenhalgh J, Jagosh J, Greenhalgh T. RAMESES II reporting standards for realist evaluations. *BMC Med.* 2016 Dec;14(1):1-8.
  41. QSR International Pty Ltd. (2018) NVivo (Version 12), <https://www.qsrinternational.com/nvivo-qualitative-data-analysis-software/home>
  42. Clarkson, PJ. iitoolkit.com [Internet]. Improving Improvement. A toolkit for Engineering Better Care. 2019. Available from: <http://www.iitoolkit.com/>
  43. Mulder, P. (2017). MoSCoW Method. Retrieved 14/11/22 from Toolshero: <https://www.toolshero.com/project-management/moscow-method/>
  44. Curtis L, Burns, A. Unit Costs of Health and Social Care. Personal Social Services Research Unit, University of Kent, Canterbury. 2019. Available from: <https://www.pssru.ac.uk/project-pages/unit-costs/unit-costs-2019/>
  45. Powell, B. J., Waltz, T. J., Chinman, M. J., Damschroder, L. J., Smith, J. L., Matthieu, M. M., ... & Kirchner, J. E. (2015). A refined compilation of implementation strategies: results from the Expert Recommendations for Implementing Change (ERIC) project. *Implement. Sci.* 10(1), 1-14.
  46. Colling C, Khondoker M, Patel R, Fok M, Harland R, Broadbent M, McCrone P, Stewart R. Predicting high-cost care in a mental health setting. *B J Psych Open.* 2020 Jan 17;6(1):e10. doi: 10.1192/bjo.2019.96. PMID: 31950891; PMCID: PMC7001466
  47. John A, DelPozo-Banos M, Gunnell D, Dennis M, Scourfield J, Ford DV, Kapur N, Lloyd K. Contacts with primary and secondary healthcare prior to suicide: case-control whole-population-based study using person-level linked routine data in Wales, UK, 2000-2017. *BJ Psych.* 2020 Dec;217(6):717-724. doi: 10.1192/bjp.2020.137. PMID: 32744207; PMCID: PMC7705668.
  48. DelPozo-Banos M, Lee SC, Friedmann Y, Akbari A, Torabi F, Lloyd K, et al. (2022) Healthcare contacts with self-harm during COVID-19: An ecohort whole-population-based study using individual-level linked routine electronic health records in Wales, UK, 2016—March 2021. *PLoS One* 17(4): e0266967. <https://doi.org/10.1371/journal.pone.0266967>



Figure 1

Figure 1, Recruitment aims across project stages

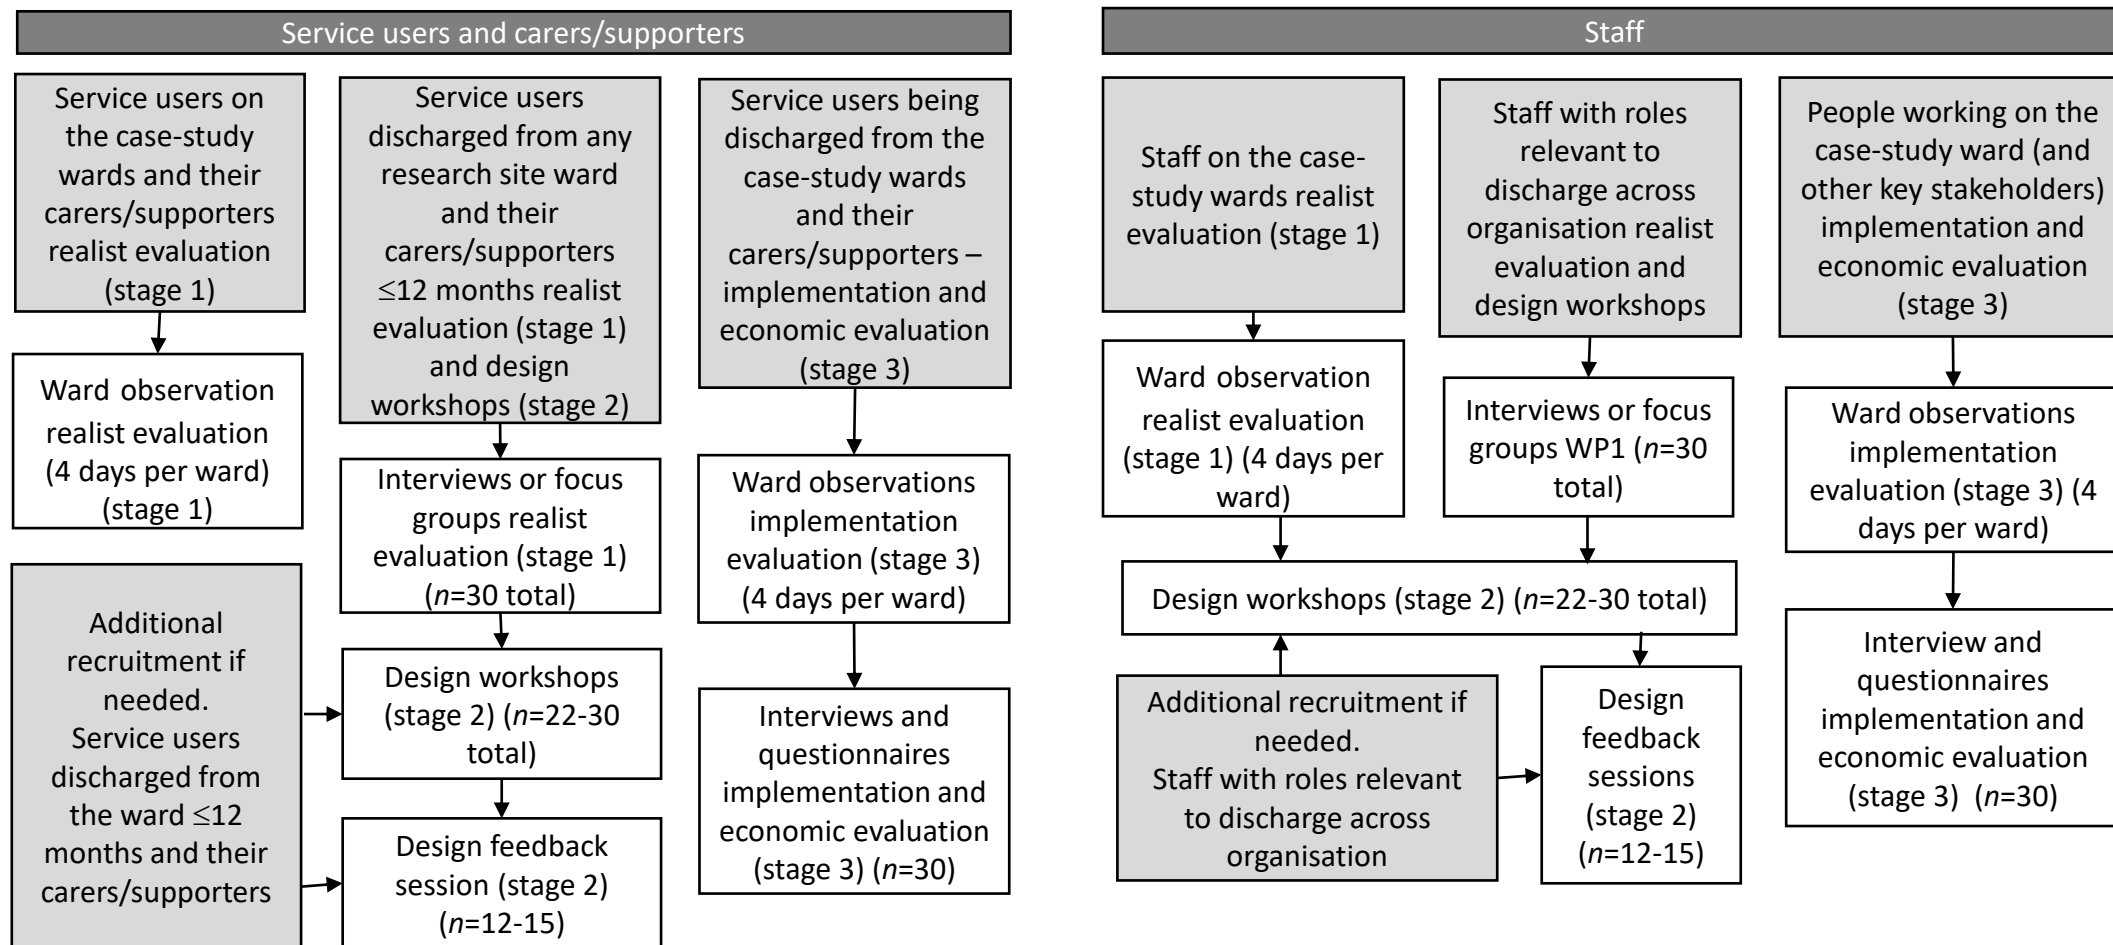

Figure 2, example of efficiency as a Context-Mechanism-Outcome Configuration across macro, meso and micro levels of the system

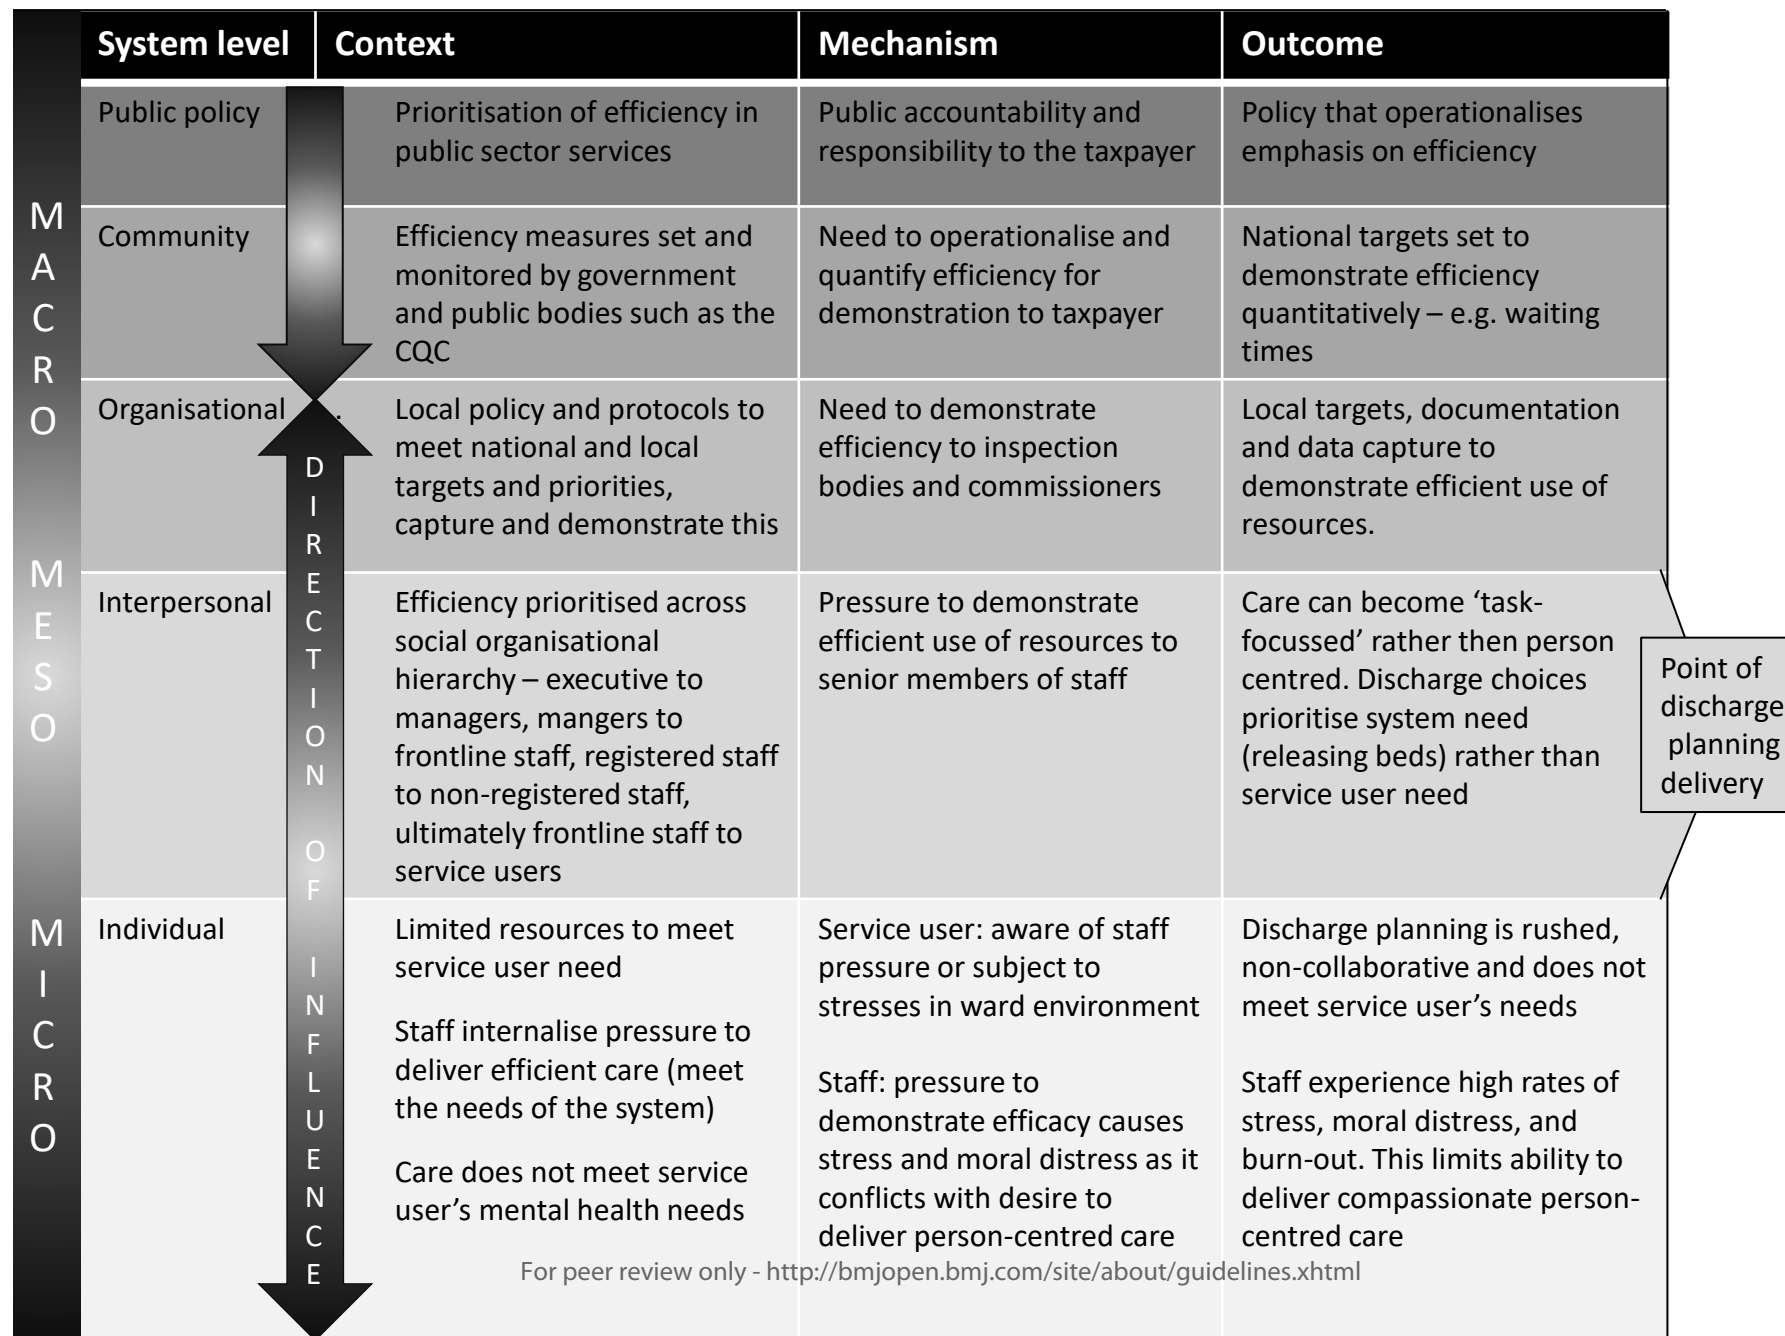

1  
2  
3  
4  
5  
6  
7  
8  
9  
10  
11  
12  
13  
14  
15  
16  
17  
18  
19  
20  
21  
22  
23  
24  
25  
26  
27  
28  
29  
30  
31  
32  
33  
34  
35  
36  
37  
38  
39  
40  
41

# BMJ Open

## Co-designing a systemic discharge intervention for inpatient mental health settings (MINDS): a protocol for integrating realist evaluation and an engineering-based systems approach

|                                 |                                                                                                                                                                                                                                                                                                                                                                                                                                                                                                                                                                                                                                                                                                                                                                                                                                                                                                                                                                                                                                                                                                                                                                                                                                                                                                                                                                                                                                                                                                                                                                                                                                                                                                                               |
|---------------------------------|-------------------------------------------------------------------------------------------------------------------------------------------------------------------------------------------------------------------------------------------------------------------------------------------------------------------------------------------------------------------------------------------------------------------------------------------------------------------------------------------------------------------------------------------------------------------------------------------------------------------------------------------------------------------------------------------------------------------------------------------------------------------------------------------------------------------------------------------------------------------------------------------------------------------------------------------------------------------------------------------------------------------------------------------------------------------------------------------------------------------------------------------------------------------------------------------------------------------------------------------------------------------------------------------------------------------------------------------------------------------------------------------------------------------------------------------------------------------------------------------------------------------------------------------------------------------------------------------------------------------------------------------------------------------------------------------------------------------------------|
| Journal:                        | <i>BMJ Open</i>                                                                                                                                                                                                                                                                                                                                                                                                                                                                                                                                                                                                                                                                                                                                                                                                                                                                                                                                                                                                                                                                                                                                                                                                                                                                                                                                                                                                                                                                                                                                                                                                                                                                                                               |
| Manuscript ID                   | bmjopen-2022-071272.R2                                                                                                                                                                                                                                                                                                                                                                                                                                                                                                                                                                                                                                                                                                                                                                                                                                                                                                                                                                                                                                                                                                                                                                                                                                                                                                                                                                                                                                                                                                                                                                                                                                                                                                        |
| Article Type:                   | Protocol                                                                                                                                                                                                                                                                                                                                                                                                                                                                                                                                                                                                                                                                                                                                                                                                                                                                                                                                                                                                                                                                                                                                                                                                                                                                                                                                                                                                                                                                                                                                                                                                                                                                                                                      |
| Date Submitted by the Author:   | 25-Apr-2023                                                                                                                                                                                                                                                                                                                                                                                                                                                                                                                                                                                                                                                                                                                                                                                                                                                                                                                                                                                                                                                                                                                                                                                                                                                                                                                                                                                                                                                                                                                                                                                                                                                                                                                   |
| Complete List of Authors:       | Hackmann, Corinna; Norfolk and Suffolk NHS Foundation Trust, Research and Development<br>Komashie, Alexander; University of Cambridge School of Technology, Department of Engineering<br>Handley, Melanie; University of Hertfordshire, CRIPACC<br>Murdoch, Jamie; King's College London, School of Life Course and Population Sciences,<br>Wagner, Adam; NIHR Collaboration for Leadership in Applied Health Research & Care (CLAHRC) East of England, ; University of East Anglia, Norwich Medical School<br>Grünwald, Lisa Marie; Norfolk and Suffolk Foundation Trust<br>Waller, Sam; University of Cambridge, Engineering Design Centre<br>Kaminskiy, Emma; Anglia Ruskin University, School of Psychology and Sports Science<br>Zeilig, Hannah; University of the Arts London, London College of Fashion<br>Jones, Julia; University of Hertfordshire, Centre for Research in Primary & Community Care<br>Bray, Joy; Independant<br>Bagge, Sophie; Norfolk and Suffolk NHS Foundation Trust<br>Simpson, Alan; King's College London, Health Services and Population Research; King's College London<br>Dalkin, Sonia; Northumbria University, Faculty of Health and Life Sciences<br>Clarkson, John; University of Cambridge, Engineering Design Centre<br>Borghini, Giovanni; Hertfordshire and Peterborough NHS Foundation Trust<br>Kipouros, Timoleon; University of Cambridge, Department of Engineering<br>Rohricht, Frank ; East London NHS Foundation Trust<br>Taousi, Zohra; Hertfordshire and Peterborough NHS Foundation Trust<br>Haighton, Catherine ; Northumbria University,<br>Rae, Sarah; Cambridgeshire and Peterborough NHS Foundation Trust<br>Wilson, Jon; Norfolk and Suffolk NHS Foundation Trust, |
| <b>Primary Subject Heading</b>: | Mental health                                                                                                                                                                                                                                                                                                                                                                                                                                                                                                                                                                                                                                                                                                                                                                                                                                                                                                                                                                                                                                                                                                                                                                                                                                                                                                                                                                                                                                                                                                                                                                                                                                                                                                                 |
| Secondary Subject Heading:      | Health services research                                                                                                                                                                                                                                                                                                                                                                                                                                                                                                                                                                                                                                                                                                                                                                                                                                                                                                                                                                                                                                                                                                                                                                                                                                                                                                                                                                                                                                                                                                                                                                                                                                                                                                      |

1  
2  
3  
4  
5  
6  
7  
8  
9  
10  
11  
12  
13  
14  
15  
16  
17  
18  
19  
20  
21  
22  
23  
24  
25  
26  
27  
28  
29  
30  
31  
32  
33  
34  
35  
36  
37  
38  
39  
40  
41  
42  
43  
44  
45  
46  
47  
48  
49  
50  
51  
52  
53  
54  
55  
56  
57  
58  
59  
60

|           |                                                                    |
|-----------|--------------------------------------------------------------------|
| Keywords: | MENTAL HEALTH, QUALITATIVE RESEARCH, Adult psychiatry < PSYCHIATRY |
|           |                                                                    |

SCHOLARONE™  
Manuscripts

**Title**

Co-designing a systemic discharge intervention for inpatient mental health settings (MINDS): a protocol for integrating realist evaluation and an engineering-based systems approach

**Full name, postal address and e-mail of the corresponding author**

Corinna Hackmann  
Research and Development Dept  
Norfolk and Suffolk Foundation Trust  
Hellesdon Hospital  
Drayton High Road  
NR6 5BE

Email: [Corinna.hackmann@nsft.nhs.uk](mailto:Corinna.hackmann@nsft.nhs.uk)  
Telephone number: 07946 355725

**Email address for each author**

Alexander Komashie: [ak670@cam.ac.uk](mailto:ak670@cam.ac.uk)  
Melanie Handley: [m.j.handley@herts.ac.uk](mailto:m.j.handley@herts.ac.uk)  
Jamie Murdoch: [jamie.murdoch@kcl.ac.uk](mailto:jamie.murdoch@kcl.ac.uk)  
Adam P Wagner: [Adam.Wagner@uea.ac.uk](mailto:Adam.Wagner@uea.ac.uk)  
Lisa Grunwald: [Lisa.Grunwald@nsft.nhs.uk](mailto:Lisa.Grunwald@nsft.nhs.uk)  
Sam Waller: [sdw32@cam.ac.uk](mailto:sdw32@cam.ac.uk)  
Emma Kaminskiy: [emma.kaminskiy@aru.ac.uk](mailto:emma.kaminskiy@aru.ac.uk)  
Hannah Zeilig: [h.zeilig@fashion.arts.ac.uk](mailto:h.zeilig@fashion.arts.ac.uk)  
Julia Jones: [j.jones26@herts.ac.uk](mailto:j.jones26@herts.ac.uk)  
Joy Bray: [joy.bray@talktalk.net](mailto:joy.bray@talktalk.net)  
Sophie Bagge: [Sophie.Bagge@nsft.nhs.uk](mailto:Sophie.Bagge@nsft.nhs.uk)  
Alan Simpson: [alan.simpson@kcl.ac.uk](mailto:alan.simpson@kcl.ac.uk)  
Sonia Dalkin: [s.dalkin@northumbria.ac.uk](mailto:s.dalkin@northumbria.ac.uk)  
John Clarkson: [pjc10@cam.ac.uk](mailto:pjc10@cam.ac.uk)  
Giovanni Borghini: [g.borghini@nhs.net](mailto:g.borghini@nhs.net)  
Timoleon Kipouros: [tk291@cam.ac.uk](mailto:tk291@cam.ac.uk)  
Frank Röhricht: [frank.rohricht@nhs.net](mailto:frank.rohricht@nhs.net)  
Zohra Taousi: [z.taousi@nhs.net](mailto:z.taousi@nhs.net)  
Catherine Haighton: [Katie.haighton@northumbria.ac.uk](mailto:Katie.haighton@northumbria.ac.uk)  
Sarah Rae: [sarah.rae@rockyroad.org.uk](mailto:sarah.rae@rockyroad.org.uk)  
Jon Wilson: [Jon.Wilson@nsft.nhs.uk](mailto:Jon.Wilson@nsft.nhs.uk)

**Full name, department, institution, city and country of all co-authors**

Corinna Hackmann,<sup>1,2</sup> Alexander Komashie,<sup>3,4</sup> Melanie Handley,<sup>5</sup> Jamie Murdoch,<sup>6</sup> Adam P Wagner,<sup>2,7</sup> Lisa Grunwald,<sup>1</sup> Sam Waller,<sup>3</sup> Emma Kaminskiy,<sup>8</sup> Hannah Zeilig,<sup>9</sup> Julia Jones,<sup>5</sup> Joy Bray, Sophie Bagge,<sup>1</sup> Alan Simpson,<sup>10</sup> Sonia Dalkin,<sup>11</sup> John Clarkson,<sup>3</sup> Giovanni Borghini,<sup>12</sup> Timos Kipouros,<sup>3</sup> Frank Röhricht,<sup>13,14</sup> Zohra Taousi,<sup>12</sup> Catherine Haighton,<sup>11</sup> Sarah Rae\*, Jon Wilson\*<sup>1,2</sup>

1  
2  
3 \* Sarah Rae and Jon Wilson are joint senior authors  
4

- 5 1. Norfolk and Suffolk NHS Foundation Trust, Norwich, UK
- 6 2. Norwich Medical School, University of East Anglia, Norwich, UK
- 7 3. Engineering Design Centre, Department of Engineering, University of Cambridge, Cambridge, UK
- 8 4. The Healthcare Improvement Studies (THIS) Institute, University of Cambridge, Cambridge, UK
- 9 5. Centre for Research in Public Health & Community Care (CRIPACC), University of Hertfordshire, Hatfield, UK
- 10 6. School of Life Course and Population Sciences, King's College London, London, UK
- 11 7. National Institute for Health Research (NIHR) Applied Research Collaboration (ARC) East of England (EoE),  
12 Cambridge, UK
- 13 8. School of Psychology and Sports Science, Anglia Ruskin University, Cambridge, UK
- 14 9. London College of Fashion, University of the Arts, London, UK
- 15 10. Florence Nightingale Faculty of Nursing, Midwifery and Palliative Care, King's College London, London, UK
- 16 11. Faculty of Health and Life Sciences, Northumbria University Faculty of Health and Life Sciences, Newcastle upon  
17 Tyne, UK
- 18 12. Hertfordshire Partnership University NHS Foundation Trust
- 19 13. East London NHS Foundation Trust, London, UK
- 20 14. Wolfson Institute of Population Health, Queen Mary University of London, London, UK

21  
22 Joy Bray and Sarah Rae are independent  
23

24  
25 **Word count, excluding title page, abstract, references, figures and table**  
26

27 Word Count: 5174 words.  
28  
29

30  
31 **Keywords**  
32

- 33 • Mental health
- 34 • Hospital discharge
- 35 • Co-production
- 36 • Systems approach
- 37 • Realist research
- 38 • Socio-technical system
- 39
- 40
- 41
- 42
- 43
- 44
- 45
- 46
- 47
- 48
- 49
- 50
- 51
- 52
- 53
- 54
- 55
- 56
- 57
- 58
- 59
- 60

## ABSTRACT

### Introduction

Transition following discharge from mental health hospital is high risk in terms of relapse, readmission, and suicide. Discharge planning supports transition and reduces risk. It is a complex activity involving interacting systemic elements. The MINDS study aims to improve the process for people being discharged, their carers/supporters and staff who work in mental health services, by understanding, co-designing and evaluating implementation of a systemic approach to discharge planning.

### Methods and analysis

The MINDS study integrates realist research and an engineering-informed systems approach across three stages. Stage 1 applies realist review and evaluation using a systems approach to develop programme theories of discharge planning. Stage 2 uses an Engineering Better Care framework to co-design a novel systemic discharge intervention, which will be subject to process and economic evaluation in Stage 3. The programme theories and resulting care planning approach will be refined throughout the study ready for a future clinical trial. MINDS is co-led by an expert by experience, with researchers with lived experience co-leading each stage.

### Ethics and dissemination

MINDS stage 1 has received ethical approval from Yorkshire & The Humber - Bradford Leeds (Research Ethics Committee (22/YH/0122)). Findings from MINDS will be disseminated via high impact journal publications and conference presentations, including those with service user and mental health professional audiences. We will establish routes to engage with public and service user communities and NHS professionals including blogs, podcasts and short videos.

### Registration

MINDS is funded by the National Institute of Health Research (NIHR 133013) <https://fundingawards.nihr.ac.uk/award/NIHR133013> The realist review protocol is registered on PROSPERO (CRD42021293255).

## STRENGTHS AND LIMITATIONS OF THIS STUDY

- MINDS was conceived from lived experience and is aiming for high standards of co-production
- MINDS incorporates realist methods with a systems-based engineering approach to understand and improve discharge experience and outcomes
- The complexity and pace of delivery and funding constraints might be barriers to co-production, but the team have extensive experience, is evaluating levels of co-production and will report these
- Some aspects of the MINDS project, including the translation of lived experience into outputs, are flexible and responsive to emerging discoveries; consequently, there may be refinements to the protocol – these will be outlined in related MINDS publications

## INTRODUCTION

The transition period following discharge is high risk; around 13% of people are quickly readmitted<sup>1</sup> and rates of suicide have been found to be 191 times higher for working age adults compared to

1  
2  
3 matched-age comparators.<sup>2</sup> A wide range of factors contribute to relapse following discharge,  
4 including feeling overwhelmed, managing mental health symptoms, returning to roles and day-to-day  
5 pressures of life.<sup>3,4,5</sup> Discharge planning supports transition and reduces risk by identifying post-  
6 discharge needs and how to manage these.<sup>3,6</sup> National Institute of Health and Care Excellence (NICE)  
7 guidance and the Care Quality Commission identify that discharge planning should be collaborative  
8 and person centred<sup>7,8</sup> but provide limited clarity on how this should be achieved.

9  
10  
11 Evidence suggests that discharge is often inadequately planned with little involvement from the  
12 person being discharged and their carers/supporters, resulting in poor transition and increased risk.<sup>9-</sup>  
13 <sup>12</sup>The charity Mind surveyed 1,221 people who had experienced discharge finding that 33% were given  
14 either no or insufficient notice of discharge, and for 37% there was no plan post discharge.<sup>13</sup>

15  
16 Discharge planning is complex and involves many multi-faceted interacting systemic elements. People  
17 are heterogenous in terms of needs. Mental health service delivery is reliant on the reasoning,  
18 reactions and actions of staff, which are influenced by the wider system. Discharge planning therefore  
19 needs to address the needs of the person being discharged while working within organisational  
20 complexity, constraints and priorities.

21  
22  
23 Previous interventions neglect complex systemic factors that either support or undermine discharge  
24 planning.<sup>14</sup> Neglecting the wider system, including systemic pressures and the needs of staff, is likely  
25 to explain why previous attempts to improve discharge have failed. To establish effective discharge  
26 planning procedures, it is critical to understand the ward as a complex system (operating within wider  
27 systems and national policy). Acknowledging such complexity reframes health services research “from  
28 investigations of complex social interventions to interventions in complex social systems”,<sup>15</sup> echoing  
29 perspectives articulated across public health and global health systems research.<sup>16,17</sup> Despite growing  
30 recognition of the need for systems approaches in healthcare,<sup>18-21</sup> to date no research has used this to  
31 improve mental health discharge.

## 32 33 34 35 **METHODS AND ANALYSIS**

### 36 37 **Study design**

38 The MINDS study commenced 01/01/2022 and ends 01/01/2025. The MINDS study will innovatively  
39 integrate realist research and an engineering-informed systems approach to co-design a systemic  
40 approach to discharge. Realist reviews<sup>22</sup> and evaluations<sup>23</sup> can be foundational for complex  
41 intervention development as they explain how and why change occurs through causal mechanisms.<sup>24</sup>  
42 Discharge planning is a multifaceted activity involving many systemic elements including service users,  
43 healthcare staff, policy, documentation, information systems and external bodies. We will use a  
44 healthcare-based systems approach as a framework for building and refining programme theories of  
45 discharge planning that set out relationships of components across system-levels in a socio-technical  
46 context (that is, people interacting with each other and technical components such as electronic  
47 records). This will comprise multiple context-mechanism-outcome configurations to explain what  
48 works, for whom and in what circumstances. The programme theories will inform system design  
49 solutions for discharge (see below for an example).

50  
51  
52 Engineering Better Care is an established engineering systems approach for the design of safe and  
53 successful healthcare delivery.<sup>25-27</sup> The framework involves four key perspectives:<sup>28</sup> 1) ‘People’  
54 focusses on the needs of key stakeholders; 2) ‘Systems’ explores the interactions between  
55 stakeholders and layers of the system; 3) ‘Design’ encourages innovation and investigates issues  
56 before proposing solutions; 4) ‘Risk’ predicts and models the risks associated with all proposed  
57 solutions. This framework will inform the co-design of a systemic approach to discharge.  
58 Implementation and economic implications will be evaluated to refine the discharge process.



1  
2  
3 Across the stages of the study, we will build evidence-based theories to co-design and trial a Systemic  
4 Discharge Approach that promotes collaborative discharge planning. For the purposes of this protocol,  
5 this will be referred to as 'the intervention'. It is anticipated that the intervention will be multifaceted,  
6 this may include training, changes to processes and documentation. It will be designed to address  
7 factors inhibiting collaborative discharge planning across the levels of the system with consideration  
8 to potential unintended consequences arising from new ways of working.  
9  
10

### 11 12 13 **Project aim**

14 Co-produce and evaluate implementation and cost impact of a systemic approach to discharge.  
15

### 16 **Project objectives**

- 17 1. **Understand** discharge planning as a complex intervention
- 18 2. **Co-design** a systemic discharge intervention
- 19 3. **Evaluate** acceptability, implementation, and cost-impact of the new discharge intervention  
20  
21

### 22 **Research questions**

- 23 1. How and in what contexts is mental health discharge currently performed?
- 24 2. Who are the primary stakeholders (e.g., service users,<sup>a</sup> carers/supporters, NHS staff), how can  
25 they be characterised, and what are their needs?
- 26 3. What are the successful outcomes for mental health discharge, how do these relate to  
27 contexts across the system, and what are the mechanisms underlying this?
- 28 4. How can mental health discharge be improved?
- 29 5. How can this be implemented and measured?  
30  
31  
32  
33  
34

### 35 **Patient and Public Involvement**

36 The MINDS study is co-led by SR, who conceived the idea from lived experience of unhelpful discharge.  
37 Each stage is co-led by researchers with relevant lived experience. MINDS includes a Lived Experience  
38 Advisory Group (LEAG) comprised of people with relevant lived experience or experience of being a  
39 significant carer or supporter. The LEAG will offer governance and support co-production and key  
40 strategic decision-making throughout the project. The study Steering Committee (SSC) includes two  
41 members with lived experience, one of whom is co-chair. The methodological approaches adopted  
42 align with current empirical healthcare research theory including MRC complex intervention  
43 guidance.<sup>29</sup> Systems and realist approaches were selected as they also intrinsically value and prioritise  
44 key stakeholder perspectives and an iterative approach to knowledge generation.  
45  
46  
47  
48

### 49 **Case Study sites**

50 Sites were purposively sampled to represent geographically distinct (serving rural and urban  
51 communities) statutory mental healthcare organisations with different demographic profiles and  
52 mixed public inspection ratings. Three mental healthcare sites are included. Two wards will be  
53 selected from each site for ward observations and evaluation of the new intervention. MINDS  
54  
55

---

56  
57 <sup>a</sup> The MINDS research team's preferred term for people who have lived experience of accessing mental  
58 services is 'people'. However, we have used the term 'service user' where discussing participants in the  
59 research project to delineate between different groups  
60

1  
2  
3 recognises that minority ethnic service users are disproportionately detained under the UK Mental  
4 Health Act<sup>30-32</sup> and overrepresented among psychiatric in-patients in UK statutory provision.<sup>33</sup>  
5 Consequently, we will monitor recruitment and employ targeted strategies to ensure the study sample  
6 reflects diversity of experience.  
7  
8  
9

## 10 **Recruitment**

11  
12 Figure 1 details recruitment aims across the MINDS project. There will be diverse promotion of the  
13 study to ensure broad access to participation, including (but not limited to) posters in clinical areas,  
14 participation newsletters, attendance at participation events. Additionally, eligible individuals may be  
15 contacted by their clinical team, or where they have signed-up to be contacted for research, by the  
16 research team to enquire if they are interested in participation.  
17  
18  
19  
20

21 Figure 1 [here]

22  
23 Figure 1, Recruitment aims across the three stages  
24  
25

## 26 **Inclusion criteria**

### 27 **Service users**

28  
29 Interviews, focus groups and workshops: all service users (18 years and over), accessing community  
30 mental health services in the case study sites, discharged within the previous 12 months (stage 1), or  
31 being discharged from a case study site ward (stage 3), will be eligible.  
32  
33

34 Ward-based observations: all service users (18 years and over) currently admitted on selected wards.  
35  
36  
37

### 38 **Staff**

39  
40 Staff, working in participating mental healthcare organisations, whose role impacts (directly or  
41 indirectly) on inpatient discharge.  
42  
43  
44

### 45 **Carers/supporters**

46  
47 Carers/supporters (people who identify as having a significant caring or supportive role) for people  
48 who have experienced inpatient discharge in one of the participating mental healthcare organisations  
49 within the last 12 months.  
50  
51  
52  
53  
54

## 55 **RESEARCH PLAN**

56  
57 The MINDS study operates across three stages.  
58  
59  
60

## Stage 1: Understand discharge planning as a complex intervention

### Aim

Build, test and refine evidence-based programme theories of discharge planning and preparation

### Objectives

- 1) Conduct a realist review integrating the Engineering Better Care systems approach to map and explain the relationship between key factors involved in discharge planning
- 2) Identify service user needs for discharge planning
- 3) Test programme theories in a realist evaluation across three case study sites
- 4) Refine programme theories to inform co-design work in stage 2

### Design

#### *Realist Review*

A realist review will synthesise quantitative and qualitative evidence on service user, carer, and staff experiences of, and interventions for, discharge planning. The review will result in evidence-based theories that include factors across all system levels to explain post-discharge outcomes. The review will consist of three iterative phases:

1) Defining review scope, concept mining and initial theory development: a series of meetings with the research team and LEAG will be used to define the system of interest. Initial programme theories will be developed from literature identified from a systematic review<sup>14</sup> and an internal systematic search with supplementary searches for existing programme theories of mental health discharge planning. This will involve extraction of data, initially from key papers, on contexts relevant to discharge planning, the outcomes relating to these contexts, and the mechanisms underlying the observed relationships between context and outcome. These will be formulated into 'IF, THEN, BECAUSE' statements, e.g., IF discharge is planned with involvement from service user, THEN the person is less likely to relapse post discharge, BECAUSE the discharge meets the needs of the service user. Numerous theories are likely to be identified, therefore the credibility and relevance to the scope of the review will be regularly assessed by the research team and LEAG members to retain the focus to the system of interest (i.e., mental health inpatient discharge planning). Programme theories will be mapped against the levels of the system to ensure sufficient spread and attention to factors relevant for subsequent stages of the study.

2) Theory testing and refinement: the core review team will test and refine the IF, THEN, BECAUSE statements iteratively against findings from additional research papers, this will include discussions with the wider research team and LEAG. There are inherent biases in the literature and the lived experience perspective will help ensure that theories are relevant to those accessing services.

3) Analysis and synthesis: The engineering-based systems approach will provide a framework for analysis to ensure; programme theories, articulated as Context-Mechanism-Outcome Configurations (CMOCs), map across macro, meso and micro levels of the system. An example of 'efficiency' is illustrated in see Figure 2 for how the concept might operate across the different system levels. Other factors might include risk management or social/clinical narrative about specific diagnoses). NVivo will be used to organise and track analysis. Tabulation and narrative write-up of evidence related to each programme theory will be shared with the research team and LEAG to support transparency and rigour

1  
2  
3 in the analysis process. For more detail see realist review protocol on PROSPERO (CRD42021293255).  
4

5  
6 Figure 2 [here]

7 Figure 2, Example of efficiency as a Context Mechanism Outcome Configuration across macro, meso  
8 and micro levels of the system  
9

### 10 11 12 *Realist Evaluation*

13  
14 We will conduct service user, carer and staff interviews, focus groups<sup>34</sup> and ward observations to  
15 refine the programme theories. An embedded case study design<sup>35</sup> will test programme theory  
16 components across systems within and between sites. Findings will be compared across the sites and  
17 participants to identify similarities and differences related to the CMOCs. We will look specifically to  
18 see how differences are linked to the contextual features of the sites and characteristics of the  
19 participants to understand how this affects the behaviour of mechanisms (i.e., in which circumstances  
20 are they triggered or not and with what outcome). This is key to ensuring transferability and  
21 acceptability of the new approach.  
22  
23

24 The interviews and focus groups will serve two purposes. Firstly, service users and carers will be asked  
25 about their experiences prior to, during and post the inpatient admission that relate to discharge  
26 planning. Staff will be asked to explain their role in the trust, any processes, resources, or strategies  
27 they use and their experiences of discharge planning with service users. This will establish the personal  
28 and professional context of participants and allow for new concepts to be identified. Secondly, the  
29 interviews and focus groups will take the form of a 'teacher-learner' cycle,<sup>36</sup> inviting participants to  
30 confirm, refute or expand components of the programme theories based on their experience.  
31 Participant deliberations of the programme theories will be contrast against the original assumptions  
32 to identify where there are disagreements and alternative explanations. This will strengthen  
33 understanding of how the context in which discharge planning takes place impacts service user and  
34 staff experience, thereby elucidating the circumstances in which mechanisms are triggered. Staff  
35 whose roles directly or indirectly impact discharge will be recruited across different levels of the  
36 system. Relevant sections of medical notes of service users recruited to interviews and focus groups  
37 (who consent to this) will be reviewed to further understand the discharge process. This includes data  
38 on route of admission, route of discharge, and any documentation of discharge planning and the  
39 discharge meeting. Anonymised data will be collected to provide aggregated service user  
40 characteristics and map the discharge process.  
41  
42  
43  
44  
45

46 Ward observations be conducted at each of the participating wards and will include observations in  
47 communal areas and of discharge conversations, relevant meetings, and ward rounds.<sup>37-39</sup> They aim  
48 to support understanding of interpersonal nuance, the way that contextual factors relate to outcomes  
49 and insights into causal mechanisms. Data will be collected using a template reflecting the programme  
50 theories. We will conduct a review of policy and strategy documents to provide an account of stated  
51 organisational aims and priorities for discharge and how documents are structured to support the  
52 process.  
53  
54  
55

### 56 57 *Analysis*

58 The analysis will follow Realist and Meta-narrative Evidence Syntheses: Evolving Standards quality  
59 standards,<sup>40</sup> using realist logic.<sup>22,23</sup> A core team will work with LEAG members to iteratively evaluate  
60

1  
2  
3 data in relation to the programme theories to facilitate theory refinement. NVivo<sup>41</sup> will support data  
4 management and analysis. Data coding will be deductive (informed by our initial programme theories),  
5 inductive (derived from the collected data) and reproductive (making inferences about mechanisms  
6 based on interpretations of our data to infer underlying causal processes). Evidence tables will be  
7 produced to demonstrate theory refinement.  
8  
9

## 10 11 12 Outputs

13 The outputs for stage 1 will include an evidence-based programme theories of discharge preparation  
14 and planning, a rich understanding of context, including the stakeholders involved and their wants  
15 and needs from the discharge process and a set of causal mechanisms operating within the discharge  
16 contexts.  
17  
18

## 19 20 **Stage 2: Co-design a systemic discharge intervention**

### 21 22 23 Aim

24 Informed by the programme theories, co-design a sustainable systemic discharge intervention that  
25 meets service user needs, is compatible with how staff work, and feasible to implement.  
26  
27  
28  
29

### 30 31 Objectives

32 Use a healthcare engineering-based systems approach as a framework to develop:

- 33 1) An agreed scope for the factors that can be changed within the discharge planning approach
- 34 2) A systemic discharge solution that has the potential to balance key wants and needs of all  
35 stakeholders
- 36 3) Methods for measuring the performance of the proposed solution against key wants and  
37 needs of service users and other stakeholders  
38  
39  
40

### 41 42 Design

43 Stage 2 uses the Engineering Better Care framework and Improving Improvement toolkit (IItoolkit,  
44 www.iitoolkit.com).<sup>42</sup> This is a systems-based engineering approach that aligns with complex  
45 intervention development, as it is non-linear, creative, and forward looking to future evaluation. The  
46 programme theories from stage 1 will provide an understanding of the context and definition of the  
47 problem across the wider system of interest (critical stages for EBC prior to designing the solution).  
48  
49  
50  
51

### 52 53 Prioritisation Workshop

54 The wants and needs service users and other key stakeholders may conflict. In this case the research  
55 team and LEAG will review these, in combination with the agreed scope. The following structure  
56 (MoSCoW method)<sup>43</sup> will be used. This will categorise wants and needs into 'must haves' (core  
57 essential needs for an improved discharge process), 'should haves' (highest priority 'wants'), 'could  
58  
59  
60

1  
2  
3  
4  
5  
6  
7  
8  
9  
10  
11  
12  
13  
14  
15  
16  
17  
18  
19  
20  
21  
22  
23  
24  
25  
26  
27  
28  
29  
30  
31  
32  
33  
34  
35  
36  
37  
38  
39  
40  
41  
42  
43  
44  
45  
46  
47  
48  
49  
50  
51  
52  
53  
54  
55  
56  
57  
58  
59  
60

aves' (secondary priority 'wants'), and 'won't have' (rejected as being incompatible with the agreed scope).

The prioritised wants and needs embody what a 'better' solution would mean, across the perspectives of stakeholders, whilst acknowledging the pragmatic reality of delivery and resource limitations.

### Exploratory Design Workshops

Iterative 3-hour exploratory design workshops will be conducted at each study site with service users, staff and carers/supporters. The research team will use the Itoolkit to develop ideas and proposals for an improved discharge process to meet the discharge needs of service users identified from the realist review and evaluation. The tools and activities within the Itoolkit will be used to support an iterative process of problem-finding and -solving, in a systems context. This encourages divergent thinking to stimulate ideas about how the discharge process can be improved, and convergent thinking to consider how these ideas can be selected, refined, and developed to produce a small set of feasible concepts. This will challenge the understanding and insights gathered from the realist evaluation and the scope of what can be delivered.

### Review and Refinement Workshop

The exploratory design workshop outputs will be considered at two 3-hour sessions with the research team and LEAG. The research team and LEAG will review, refine and evaluate the ideas and concepts from the exploratory workshops, to give a recommended lead proposal for an improved discharge process. This may involve developing tools and/or materials to better assist discharge planning, and/or reconfiguring the discharge process and/or updating the guidance for the discharge process. Examples might include a combination of training materials, clinical supervision or reflective practice templates, a discharge planning group outline, or collaborative discharge planning tools or documentation. Team members involved in this work contribute skills in systems engineering, risk assessment and design, psychology, nursing, psychiatry and lived experience of discharge.

### Feedback Sessions

The new discharge intervention will be reviewed and refined during feedback sessions, with service users, carers/supporters and clinical staff from the design workshops. This will focus on acceptability and implimentability of the new approach. Assessment will be based on the prioritised wants and needs that informed the design of the new intervention, together with the success measures. Staff will be asked to develop an implementation plan with the research team to support use of the new discharge approach on their ward. These plans will be taken to additional meetings with staff on the research wards to agree plans for implementation of the new approach on their wards.

### Explanatory Model

The research team and LEAG members will agree how the proposed solution could be practically measured against agreed wants and needs. The programme theories, prioritised discharge needs and identified outcomes associated with these and the tools and/or materials for the new systemic

1  
2  
3 discharge intervention will be used by the research team and LEAG to develop a realist-informed  
4 explanatory model including resources, activities, and measurable process indicators for  
5 implementation. This will include the components of the discharge intervention to be implemented,  
6 steps to implementation, process indicators of successful implementation, measures of  
7 acceptability, cost impact and outcomes of effective discharge. This will support data collection for  
8 stage 3  
9  
10

#### 11 12 13 Outputs

14  
15 The outputs for stage 2 will include a prioritised wants and needs for an improved discharge  
16 process, practical measures of success that are aligned with these prioritised wants and needs,  
17 the SDCA as an improved discharge process, and an explanatory model to support  
18 implementation and evaluation.  
19  
20  
21  
22

### 23 **Stage 3: Evaluate acceptability, implementation, and cost-impact of the new discharge intervention**

#### 24 25 26 Aims

- 27  
28 1) Evaluate acceptability and implementation of the discharge intervention  
29 2) Explore resource and cost implications, and determine feasibility of collecting data for a future  
30 economic evaluation  
31 3) Inform a final specification for the discharge intervention that can be tested in a future Hybrid Type  
32 II trial that will determine its effectiveness and impact, including economics.  
33  
34  
35

#### 36 Objectives

- 37  
38 1) Understand acceptability, barriers, and facilitators to implementation of the SDCA  
39 2) Evaluate how delivery and fidelity is shaped by the healthcare context  
40 3) Measure reach, adoption, and maintenance  
41 4) Risk-assess the use of the intervention  
42 5) Estimate resource and associated costs impact  
43 6) Identify recommendations for optimisation, wider implementation, and future evaluation  
44 7) Evaluate feasibility of collecting service user outcome and economic evaluation data  
45  
46  
47

#### 48 Design

49  
50 The explanatory model will support implementation and a process evaluation for stage 3. A parallel,  
51 mixed methods process evaluation will assess the feasibility of implementation, acceptability, risks  
52 and benefits, and cost impact of the discharge intervention.  
53  
54  
55

#### 56 Ward-based observations

57  
58 Ward-based observations will be conducted to investigate implementation of the discharge  
59 intervention and how this interacts with the ward and wider contexts. This will include observing  
60

1  
2  
3 discharge planning consultations and system strengthening components (e.g., training) as well as  
4 ward-based processes that impact on delivery. Researchers will attend relevant meetings (e.g.,  
5 reviews and discharge planning meetings), observe training sessions or other relevant interactions  
6 and collect data in the form of field notes. This will evaluate whether the components of the discharge  
7 approach have fidelity in terms of what was designed in the workshops, and whether it impacts the  
8 areas of service user discharge need identified and prioritised from the programme theories.  
9  
10

#### 11 12 13 Semi-structured interviews with service users, carers/supporters, and staff

14  
15 Interviews with service users will gain perspectives on the acceptability of the discharge intervention,  
16 with a specific focus on how the resulting discharge plan supported their transition from the ward to  
17 home, the quality of collaboration between themselves and ward staff, and whether their discharge  
18 plans were supportive of a safe and effective transition from the ward to home. This will be informed  
19 by the programme theories and prioritised needs. Interviews with staff will be carried out six months  
20 after commencing use of the discharge intervention to allow it to be embedded into routine practice,  
21 obtaining perspectives on acceptability, barriers and facilitators to implementation, impact on quality  
22 of care over time, and recommendations for wide-scale implementation. Interviews will be semi-  
23 structured with topic guides informed by the prioritised discharge needs of service users and possible  
24 barriers and facilitators in terms of implementation.  
25  
26  
27  
28  
29

#### 30 Service user and outcome data

31 The feasibility of collecting service user demographics and outcome data from routine medical records  
32 and questionnaires will be assessed, including readmission, suicidality, mental health symptoms,  
33 personal recovery and quality of life. Participants will complete a questionnaire containing selected  
34 measures and resource use questions to inform data collection feasibility for future evaluation,  
35 resource use and associated cost analysis. This will include the outcome measures identified from the  
36 programme theories and a resource use questionnaire. Medical records will be reviewed to assess the  
37 reach, adoption, and maintenance of the discharge intervention.  
38  
39  
40  
41

#### 42 Data Analysis

##### 43 *Qualitative analysis*

44  
45 Fieldnotes from the ward-based observations, the data from document reviews and interviews with  
46 staff and service users will be compared with the context-mechanism-outcome configurations  
47 identified in stage 1 and the realist-informed explanatory model to explore whether changes to  
48 practice occurred and met the prioritised needs as theorised. This will follow the realist logic of  
49 analysis used in stage 1. The observations and document review data will be used as measures of  
50 process indication for implementation identified in the explanatory model. This will indicate fidelity  
51 to implementation. We will also use descriptive analysis of the data from the document reviews to  
52 describe reach and adoptions (i.e., the extent of use and who it is being used with). The interviews  
53 evaluate how the process and content of the discharge intervention 'worked' from the participants'  
54 perspective, aiming to understand the quality of collaboration, usefulness of the discharge  
55 intervention, and barriers and facilitators to implementation. A constant comparison approach will be  
56 adopted, working iteratively between data obtained from different interviewees within and between  
57  
58  
59  
60



wards and case study sites. We will also analyse how different intervention components interact with relevant macro (e.g., national policy); meso (e.g., in-patient ward protocols, staff arrangements, other services); and micro (e.g., communication and behaviour within discharge planning encounters) contextual features relevant to scaled-up implementation. This will be undertaken with support of the LEAG.

### *Quantitative analysis*

Statistical analysis will include descriptive analyses of changes over time (e.g., numbers of discharge plans), and graphical plotting of changes, comparing trends between wards, both descriptively and potentially with regression. Additional analyses prompted by qualitative findings (e.g., effects of the discharge intervention on specific groups or diagnoses) will be explored. Completion rates and patterns of data collection tools will be descriptively analysed to inform the data collection feasibility for future trialling.

### *Resource use and costing analysis*

Recorded resource use will be multiplied by standard unit costs.<sup>44</sup> A key costing perspective will be that of the NHS and Social Services, but we will also disaggregate costs to consider those incurred by 1) the inpatient wards; 2) other providers; and 3) service users (e.g., out of pocket costs). This will consider which costs are one-off (e.g., training) and recurring across levels of the system. Return rates and levels/patterns of missing data on the resource use questions will be descriptively analysed to inform the feasibility of a future economic evaluation and refinements to the questionnaires to improve completion rates. Extraction of related data from routine sources will also be explored to further inform future evaluation.

### *Stakeholder focus groups*

Two stakeholder focus groups (6-8 participants per group, 12-16 in total) will be carried out towards the end of stage 3 to identify how to optimise the discharge intervention for wide-scale implementation and to determine priorities for a future trial. The key stakeholders will include a mixture of key stakeholders including mental health staff, service directors and policymakers who can provide critical insight on wider implementation. We will share findings and ask stakeholders to make recommendations for finalising the design and content of the SDCA and required system strengthening components to optimise intervention implementation. We will map components against the implementation strategies identified by the Expert Recommendations for Implementing Change<sup>45</sup> to finalise the SDCA.

### **Stage 3 Outputs**

The outputs for stage 3 will include a finalised systemic discharge intervention ready for implementation and trialling, refined programme theories setting out the factors necessary for implementation, estimation of the cost and resource impact, initial feasibility data for a Hybrid Type 2 trial of the intervention including identified service user outcomes, process/implementation indicators and economic measures.

## RECRUITMENT AND CONSENT

We are recruiting and consenting five groups of service users, carers/supporters, and staff (see Figure 1):

1. Service users who are currently admitted for the ward-based observations (stages 1 and 3)
2. Service users in the community who have had experience of discharge from a mental health ward within the last 12 months for interviews and focus groups (stages 1 and 2)
3. Service users who are being discharged (stage 3)
4. Carers/supporters of people who have been discharged in the last 12 months (stages 1, 2 and 3)
5. Staff who have roles that impact on inpatient discharge (stages 1, 2 and 3)

Recruitment of service users, carers/supporters and staff for interviews, surveys and groups will be purposive. The LEAG will advise on ways to maximise access and participation – including groups that may be at risk of under-representation due to diagnosis, ethnic background, or other demographic factors. Potential participants will be approached via multiple channels to increase access and participation, including, via clinical teams, through participation channels, and promotion including posters on wards and other service-user facing clinical spaces.

For interviews, focus groups and workshops, a research team member will arrange a consent meeting at least 48 hours after receipt of the Participant Information Sheet (PIS). It will be established that the participant has read this, understands the study and implications of participation and any questions are answered. Capacity to consent will be assessed.

On the days of the ward observation, information posters will be displayed in areas where the observations are taking place. All staff and service users will be given verbal information and a simplified PIS about the reason for the observations and be asked to verbally consent to the observations. This simplified consent process has been designed to minimise burden and confusion for service users. Observers will be wearing a lanyard that makes it clear who they are and that they are undertaking observations. If approached, they will answer questions transparently. Service users will be informed that they can choose to opt out of the observations at any time (they are also free to leave the observed space). Staff will be asked to opt out if they do not want to be observed. Staff will be informed that if they are concerned about observations including a particular service user, or if they become concerned about anybody during the observation, they can ask for the observation to be moved or terminated.

All service-users who are discharged from the 3 study sites within the first 6 months of stage 3 will be asked whether they wish to opt out of their routine data being used for research purposes.<sup>46-48</sup>

## ETHICS AND DISSEMINATION

MINDS includes protocols for managing distress or safety issues relating to interviews, focus groups and ward observations, that have received ethical approval for stage 1. These will also be applied to the activity for stages 2 & 3. The Study Steering Committee and LEAG will support ethical issues encountered during the study.

## Dissemination

We will work with the LEAG, to develop open access peer reviewed journal publications and conference presentations. We will establish routes to engage with public and service user communities including blogs, podcasts and videos via partner Mind and reaching out to other organisations e.g., National Survivor User Network (NSUN). This is NIHR Applied Research Collaboration (ARC) East of England (EoE) affiliated project and findings will be disseminated in an assessable form via ARC platforms and networks.

## Author Contributions

CHac took the lead role in design, coordinating the design and writing the protocol. MH, EK, JJ, HZ, SD and CHai led the design of stage 1. AK, CHac, SW, SB, TK and JC led the design of stage 2. JM and APW led the design of stage 3. SR, JW and LG contributed to the design across the project and the writing and editing of the protocol. SR, HZ and SB led on the lived-experience input to the conception and design across the project. JB, AS, JW, FR, GB, ZT and CHac led on clinical perspectives, clinical governance, distress management and staff input across the design of the protocol. All authors were involved in editing the protocol.

## Acknowledgements

We would like to thank LEAG members including Hajara Begum, Katie Fillingham, June Hanshaw, John Lucas, Isaac Samuels, and Roger Talbot for their ongoing input across the MINDS project; helping to ensure the processes and outputs reflect the experiences and needs of people with lived experience and their supporters.

## Funding statement

This work is funded by the NIHR (NIHR133013). APW is supported by the NIHR ARC EoE. The views expressed are those of the authors and not necessarily those of the NIHR or the Department of Health and Social Care.

## Competing interests statement

We declare no competing interests.

## REFERENCES

1. Vigod SN, Kurdyak PA, Dennis CL, Leszcz T, Taylor VH, Blumberger DM, Seitz DP. Transitional interventions to reduce early psychiatric readmissions in adults: systematic review. *BJ Psych*. 2013 Mar;202(3):187-94.
2. Musgrove, R., Carr, M. J., Kapur, N., Chew-graham, C. A., Mughal, F., Ashcroft, D. M., & Webb, R. T. (2022). Suicide and other causes of death among working- age and older adults

- 1  
2  
3 in the year after discharge from in-patient mental healthcare in England: matched cohort  
4 study. *BJ Psych.* 468–475. <https://doi.org/10.1192/bjp.2021.176>
- 5  
6 3. Mutschler C, Lichtenstein S, Kidd SA, Davidson L. Transition Experiences Following Psychiatric  
7 Hospitalization: A systematic Review of the Literature. *Community Ment. Health J.* 2019 Nov  
8 1;55(8):1255-74.
- 9  
10 4. Moreno C, Wykes T, Galderisi S, Nordentoft M, Crossley N, Jones N, Cannon M, Correll CU,  
11 Byrne L, Carr S, Chen EY. How mental health care should change as a consequence of the  
12 COVID-19 pandemic. *LANCET PSYCHIAT.* 2020 Jul 16.
- 13  
14 5. Mind. The mental health emergency: how has the coronavirus pandemic impacted our  
15 mental health? United Kingdom: Mind. Available from: [https://www.mind.org.uk/media-](https://www.mind.org.uk/media-a/5929/the-mental-health-emergency_a4_final.pdf)  
16 [a/5929/the-mental-health-emergency\\_a4\\_final.pdf](https://www.mind.org.uk/media-a/5929/the-mental-health-emergency_a4_final.pdf).
- 17  
18 6. Nurjannah I, Mills J, Usher K, Park T. Discharge planning in mental health care: an integrative  
19 review of the literature. *J. Clin. Nurs.* 2014 May;23(9-10):1175-85.
- 20  
21 7. National Institute for Health and Care Excellence (2017). Discharge from inpatient mental  
22 health services to community or care home support [NICE Quality Standard No.159]  
23 <https://www.nice.org.uk/guidance/qs159>
- 24  
25 8. Care Quality Commission. Monitoring the Mental Health Act in 2017/18. 2019. Available  
26 from: [https://www.cqc.org.uk/sites/default/files/20190320\\_mhareport1718\\_report.pdf](https://www.cqc.org.uk/sites/default/files/20190320_mhareport1718_report.pdf)
- 27  
28 9. Ådnanes M, Cresswell-Smith J, Melby L, Westerlund H, Šprah L, Sfetcu R, Straßmayr C, Donisi  
29 V. Discharge planning, self-management, and community support: Strategies to avoid  
30 psychiatric rehospitalisation from a service user perspective. *Patient Edu Couns.* 2019 Dec 5.
- 31  
32 10. Wright N, Rowley E, Chopra A, Gregoriou K, Waring J. From admission to discharge in mental  
33 health services: a qualitative analysis of service user involvement. *Health Expect.* 2016  
34 Apr;19(2):367-76.
- 35  
36 11. King EA, Baldwin DS, Sinclair JM, Campbell MJ. The Wessex recent in-patient suicide study, 2:  
37 Case–control study of 59 in-patient suicides. *BJPsych.* 2001 Jun;178(6):537-42.
- 38  
39 12. Yim PH, Yip PS, Li RH, Dunn EL, Yeung WS, Miao YK. Suicide after discharge from psychiatric  
40 inpatient care: a case-control study in Hong Kong. *Aust N Z J Psychiatry.* 2004 Jan;38(1-2):65-  
41 72.
- 42  
43 13. Mind. One In Three People Sent Home From Hospital Too Early – With No Plan For Further  
44 Mental Health Care United Kingdom: Mind. Available from: [https://www.mind.org.uk/news-](https://www.mind.org.uk/news-campaigns/news/one-in-three-people-sent-home-from-hospital-too-early-with-no-plan-for-further-mental-health-care)  
45 [campaigns/news/one-in-three-people-sent-home-from-hospital-too-early-with-no-plan-for-](https://www.mind.org.uk/news-campaigns/news/one-in-three-people-sent-home-from-hospital-too-early-with-no-plan-for-further-mental-health-care)  
46 [further-mental-health-care](https://www.mind.org.uk/news-campaigns/news/one-in-three-people-sent-home-from-hospital-too-early-with-no-plan-for-further-mental-health-care)
- 47  
48 14. Tyler N, Wright N, Waring J. Interventions to improve discharge from acute adult mental  
49 health inpatient care to the community: systematic review and narrative synthesis. *BMC*  
50 *health Serv. Res.* 2019 Dec 1;19(1):883.
- 51  
52 15. Moore, G. F., Evans, R. E., Hawkins, J., Littlecott, H., Melendez-Torres, G. J., Bonell, C., &  
53 Murphy, S. (2019). From complex social interventions to interventions in complex social  
54 systems: Future directions and unresolved questions for intervention development and  
55 evaluation. *Evaluation*, 25(1), 23–45.
- 56  
57 16. Rutter H, Savona N, Glonti K, Bibby J, Cummins S, Finegood DT, Greaves F, Harper L, Hawe P,  
58 Moore L, Petticrew M. The need for a complex systems model of evidence for public health.  
59 *Lancet.* 2017 Dec 9;390(10112):2602-4.
- 60  
61 17. De Savigny D. Systems thinking for strengthening health systems in LMICs: need for a  
62 paradigm shift. *Health Policy Plan.* 2012 Oct 1;27(suppl\_4):iv1-3.
- 63  
64 18. Carey G, Malbon E, Carey N, Joyce A, Crammond B, Carey A. Systems science and systems  
65 thinking for public health: a systematic review of the field. *BMJ Open.* 2015 Dec  
66 1;5(12):e009002.

19. Komashie A, Ward J, Bashford T, Dickerson T, Kaya GK, Liu Y, Kuhn I, Günay A, Kohler K, Boddy N, O'Kelly E, Masters J, Dean J, Meads C, Clarkson J. Systems approach to health service design, delivery and improvement: a systematic review and meta-analysis. *BMJ open*. 2021 Jan 1;11(1):e037667.
20. McNab D, McKay J, Shorrock S, Luty S, Bowie P. Development and application of 'systems thinking' principles for quality improvement. *BMJ Open Qual*. 2020 Mar 1;9(1):e000714.
21. Sturmberg JP, Martin CM, Katerndahl DA. Systems and complexity thinking in the general practice literature: an integrative, historical narrative review. *The Annals of Family Medicine*. 2014 Jan 1;12(1):66-74.
22. Pawson R. Evidence-based policy: a realist perspective. London: Sage Publications, 2006. ISBN 1-4129-1059-5
23. Pawson R, Tilley N. Realistic evaluation. London: Sage Publications 1997. ISBN 0-7619-5008-7
24. Dalkin SM, Greenhalgh J, Jones D, Cunningham B, Lhussier M. What's in a mechanism? Development of a key concept in realist evaluation. *Implement. Sci*. 2015 Dec;10(1):1-7.
25. Rustagi AS, Gimbel S, Nduati R, de Fatima Cuembelo M, Wasserheit JN, Farquhar C, Gloyd S, Sherr K, With input from the SAIA Study Team. Impact of a systems engineering intervention on PMTCT service delivery in Cote d'Ivoire, Kenya, Mozambique: A cluster randomized trial. *JAIDS*. (1999). 2016 Jul 1;72(3):e68.
26. Loh HP, de Korne DF, Chee SP, Mathur R. Reducing wrong intraocular lens implants in cataract surgery. *IJQHC*. 2017 Aug; 30: 492–505.
27. Catchpole K, Ley E, Wiegmann D, Blaha J, Shouhed D, Gangi A, Blocker R, Karl R, Karl C, Taggart B, Starnes B. A human factors subsystems approach to trauma care. *JAMA surg*. 2014 Sep 1;149(9):962-8.
28. Clarkson PJ, Bogle D, Dean J, Tooley M, Trewby J, Vaughan L, Adams E, Dudgeon P, Platt N, Shelton P. Engineering better care: A systems approach to health and care design and continuous improvement. 2017. Available at: <https://www.raeng.org.uk/publications/reports/engineering-better-care>
29. Medical Research Council. (2006). MRC Developing and evaluating complex interventions. Medical Research Council, 1–39. [www.mrc.ac.uk/complexinterventionsguidance](http://www.mrc.ac.uk/complexinterventionsguidance)
30. Gajwani R, Parsons H, Birchwood M, Singh SP. Ethnicity and detention: are Black and minority ethnic (BME) groups disproportionately detained under the Mental Health Act 2007? *Soc Psychiatry Psychiatr Epidemiol*. 2016 May 1;51(5):703-11.
31. Morgan C, Mallett R, Hutchinson G, Leff J. Negative pathways to psychiatric care and ethnicity: the bridge between social science and psychiatry. *Soc. Sci. Med*. 2004 Feb 1;58(4):739-52.
32. Singh SP, Greenwood NA, White S, Churchill R. Ethnicity and the mental health act 1983: systematic review. *BJ Psych*. 2007 Aug;191(2):99-105.
33. Bhui K, Stansfeld S, Hull S, Priebe S, Mole F, Feder G. Ethnic variations in pathways to and use of specialist mental health services in the UK: systematic review. *BJ Psych*. 2003 Feb;182(2):105-16.
34. Manzano, A. (2022). Conducting focus groups in realist evaluation. *Evaluation*, 13563890221124637.
35. Yin R. Case study research: design and methods 5th ed. Los Angeles, California: SAGE. 2013.
36. Manzano A. The craft of interviewing in realist evaluation. *Evaluation*. 2016 Jul;22(3):342-60.
37. Kaminskiy E, Finlay M. It Does Take Two to Tango: An Applied Conversation Analysis of Interactions between a Psychiatrist and Service-Users Discussing Medication. *Health Commun*. 2018 Sep 12.

- 1  
2  
3  
4  
5  
6  
7  
8  
9  
10  
11  
12  
13  
14  
15  
16  
17  
18  
19  
20  
21  
22  
23  
24  
25  
26  
27  
28  
29  
30  
31  
32  
33  
34  
35  
36  
37  
38  
39  
40  
41  
42  
43  
44  
45  
46  
47  
48  
49  
50  
51  
52  
53  
54  
55  
56  
57  
58  
59  
60
38. Gillard S, Simons L, Turner K, Lucock M, Edwards C. Patient and public involvement in the coproduction of knowledge: reflection on the analysis of qualitative data in a mental health study. *Qual. Health Res.* 2012 Aug;22(8):1126-37.
  39. Handley M, Bunn F, Lynch J, Goodman C. Using non-participant observation to uncover mechanisms: Insights from a realist evaluation. *Evaluation.* 2020 Jul;26(3):380-93.
  40. Wong G, Westhorp G, Manzano A, Greenhalgh J, Jagosh J, Greenhalgh T. RAMESES II reporting standards for realist evaluations. *BMC Med.* 2016 Dec;14(1):1-8.
  41. QSR International Pty Ltd. (2018) NVivo (Version 12), <https://www.qsrinternational.com/nvivo-qualitative-data-analysis-software/home>
  42. Clarkson, PJ. iitoolkit.com [Internet]. Improving Improvement. A toolkit for Engineering Better Care. 2019. Available from: <http://www.iitoolkit.com/>
  43. Mulder, P. (2017). MoSCoW Method. Retrieved 14/11/22 from Toolshero: <https://www.toolshero.com/project-management/moscow-method/>
  44. Curtis L, Burns, A. Unit Costs of Health and Social Care. Personal Social Services Research Unit, University of Kent, Canterbury. 2019. Available from: <https://www.pssru.ac.uk/project-pages/unit-costs/unit-costs-2019/>
  45. Powell, B. J., Waltz, T. J., Chinman, M. J., Damschroder, L. J., Smith, J. L., Matthieu, M. M., ... & Kirchner, J. E. (2015). A refined compilation of implementation strategies: results from the Expert Recommendations for Implementing Change (ERIC) project. *Implement. Sci.* 10(1), 1-14.
  46. Colling C, Khondoker M, Patel R, Fok M, Harland R, Broadbent M, McCrone P, Stewart R. Predicting high-cost care in a mental health setting. *B J Psych Open.* 2020 Jan 17;6(1):e10. doi: 10.1192/bjo.2019.96. PMID: 31950891; PMCID: PMC7001466
  47. John A, DelPozo-Banos M, Gunnell D, Dennis M, Scourfield J, Ford DV, Kapur N, Lloyd K. Contacts with primary and secondary healthcare prior to suicide: case-control whole-population-based study using person-level linked routine data in Wales, UK, 2000-2017. *BJ Psych.* 2020 Dec;217(6):717-724. doi: 10.1192/bjp.2020.137. PMID: 32744207; PMCID: PMC7705668.
  48. DelPozo-Banos M, Lee SC, Friedmann Y, Akbari A, Torabi F, Lloyd K, et al. (2022) Healthcare contacts with self-harm during COVID-19: An ecohort whole-population-based study using individual-level linked routine electronic health records in Wales, UK, 2016—March 2021. *PLoS One* 17(4): e0266967. <https://doi.org/10.1371/journal.pone.0266967>

Figure 1

Figure 1, Recruitment aims across project stages

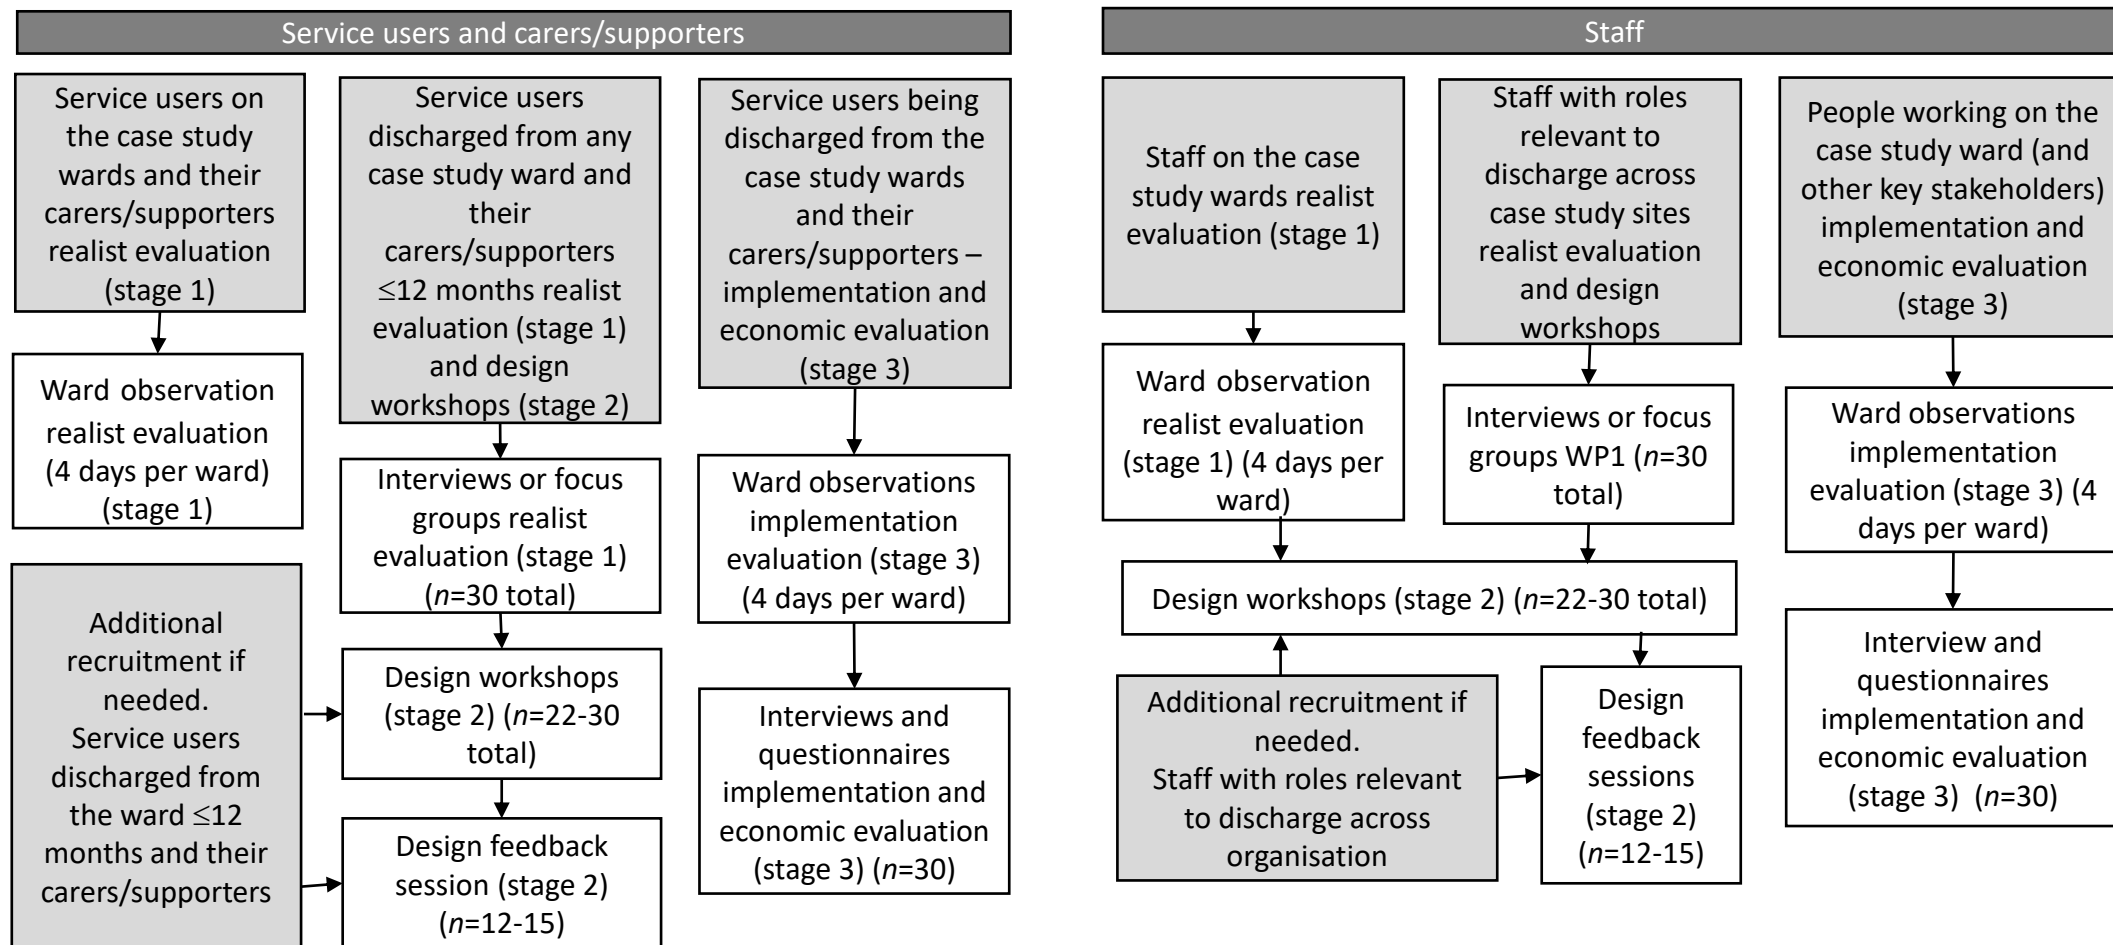

Figure 2, example of efficiency as a Context-Mechanism-Outcome Configuration across macro, meso and micro levels of the system

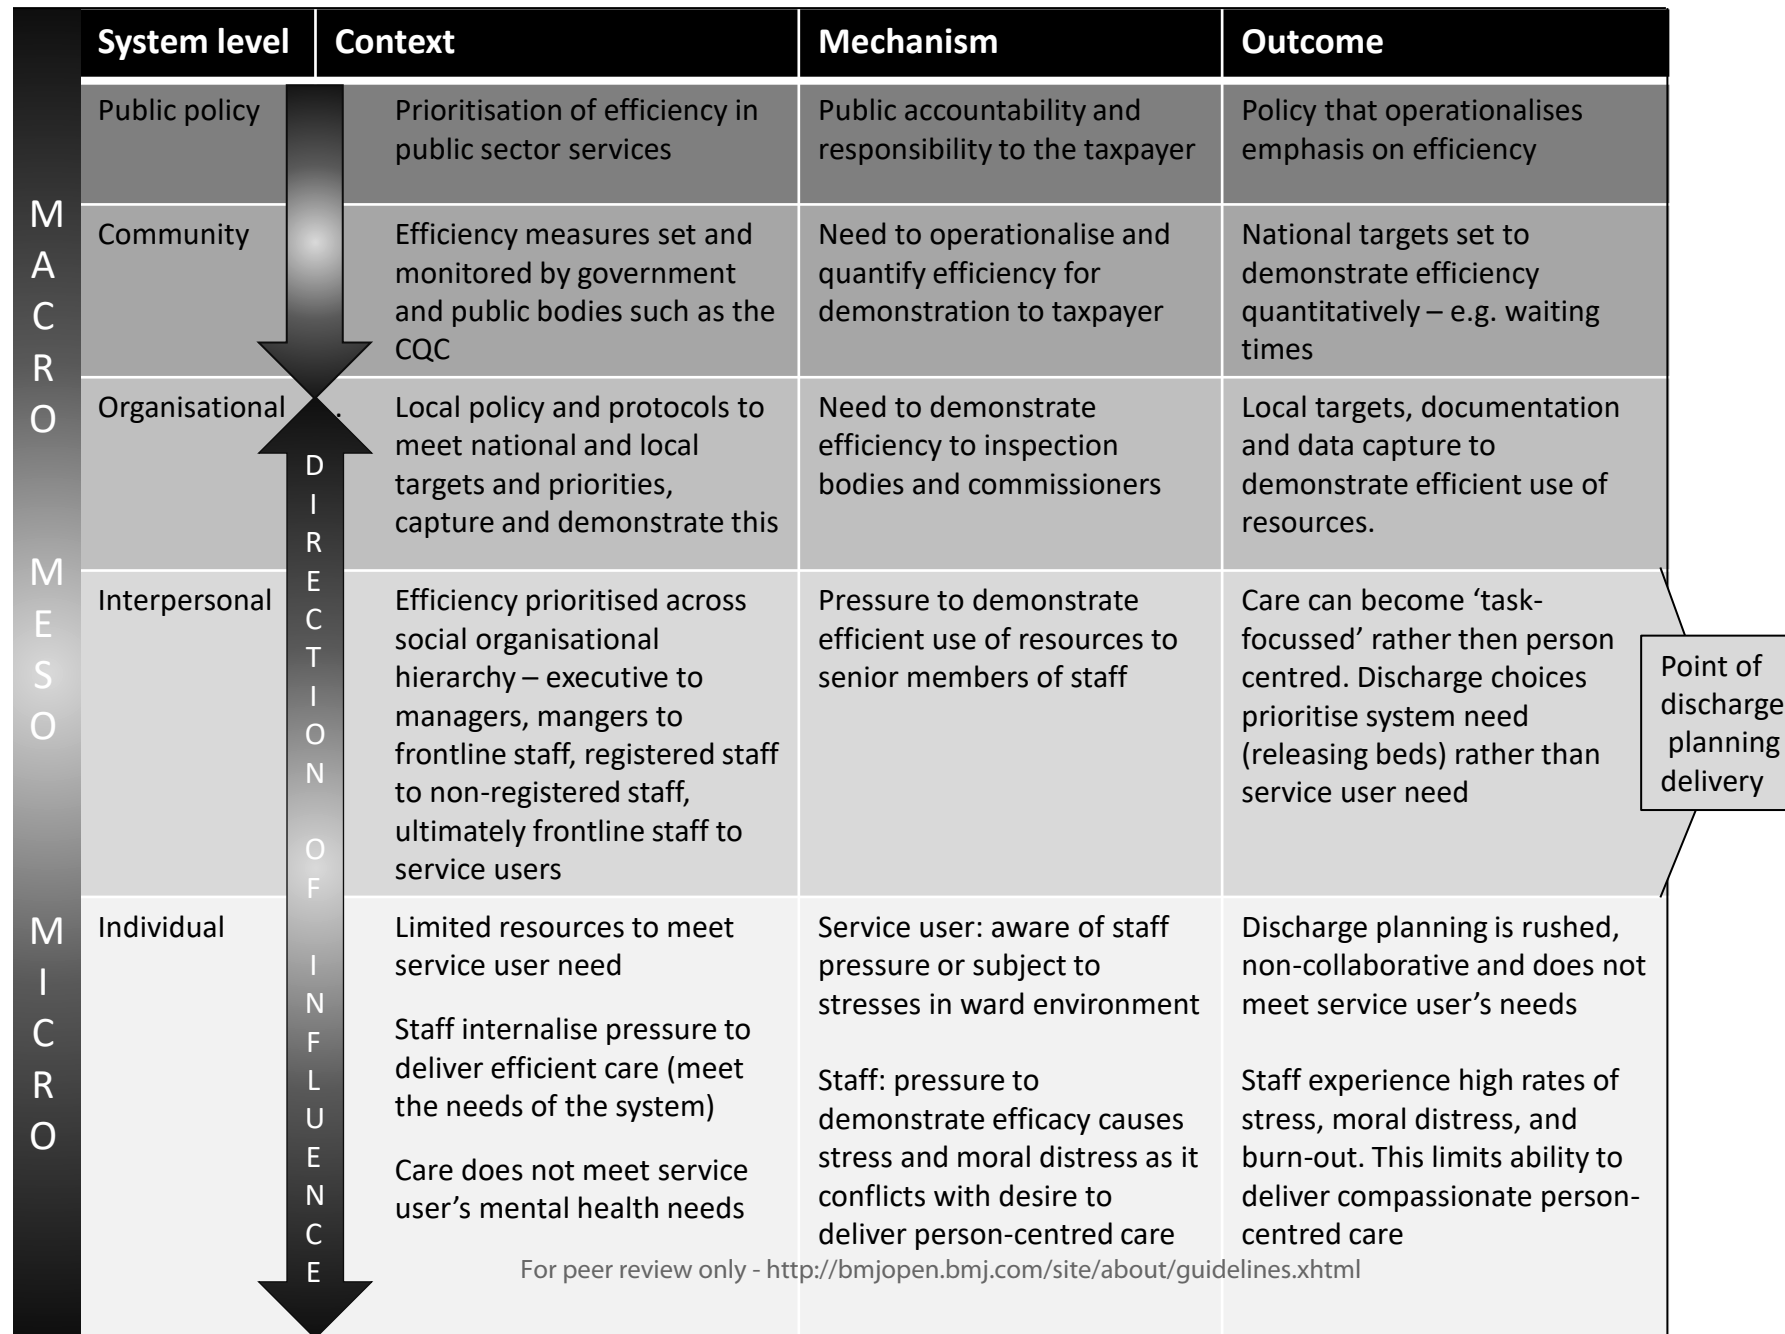

1  
2  
3  
4  
5  
6  
7  
8  
9  
10  
11  
12  
13  
14  
15  
16  
17  
18  
19  
20  
21  
22  
23  
24  
25  
26  
27  
28  
29  
30  
31  
32  
33  
34  
35  
36  
37  
38  
39  
40  
41
